# 1 **Floating EMG Sensors and Stimulators Wirelessly Powered and Operated by Volume Conduction** 2 **for Networked Neuroprosthetics**

3 Laura Becerra-Fajardo<sup>1\*</sup>, Marc Oliver Krob<sup>2</sup>, Jesus Minguillon<sup>1,3,4</sup>, Camila Rodrigues<sup>5,6</sup>, Christine Welsch<sup>2</sup>, Marc  
4 Tudela-Pi<sup>1</sup>, Albert Comerma<sup>1</sup>, Filipe Oliveira Barroso<sup>5</sup>, Andreas Schneider<sup>2</sup>, and Antoni Ivorra<sup>1,7</sup>

## 6 **Author details**

7 <sup>1</sup>Department of Information and Communications Technologies, Universitat Pompeu Fabra, 08018 Barcelona,  
8 Spain.

9 <sup>2</sup>Fraunhofer Institute for Biomedical Engineering IBMT, 66280 Sulzbach, Germany.

10 <sup>3</sup>Research Centre for Information and Communications Technologies, University of Granada, 18014 Granada,  
11 Spain.

12 <sup>4</sup>Department of Signal Theory, Telematics and Communications, University of Granada, 18014 Granada, Spain.

13 <sup>5</sup>Neural Rehabilitation Group, Cajal Institute, Spanish National Research Council (CSIC), 28002 Madrid, Spain.

14 <sup>6</sup>Electronics, Automation and Communications Department. ICAI School of Engineering, Comillas Pontifical  
15 University, 28015 Madrid, Spain.

16 <sup>7</sup>Serra Hünter Fellow Programme, Universitat Pompeu Fabra, 08018 Barcelona, Spain.

17 \*Correspondence: [laura.becerra@upf.edu](mailto:laura.becerra@upf.edu)

## 19 **Abstract**

20 **Background:** Implantable neuroprostheses consisting of a central electronic unit wired to electrodes benefit  
21 thousands of patients worldwide. However, they present limitations that restrict their use. Those limitations,  
22 which are more adverse in motor neuroprostheses, mostly arise from their bulkiness and the need to perform  
23 complex surgical implantation procedures. Alternatively, it has been proposed the development of distributed  
24 networks of intramuscular wireless microsensors and microstimulators that communicate with external systems  
25 for analyzing neuromuscular activity and performing stimulation or controlling external devices. This paradigm  
26 requires the development of miniaturized implants that can be wirelessly powered and operated by an external  
27 system. To accomplish this, we propose a wireless power transfer (WPT) and communications approach based on  
28 volume conduction of innocuous high frequency (HF) current bursts. The currents are applied through external

29 textile electrodes and are collected by the wireless devices through two electrodes for powering and bidirectional  
30 digital communications. As these devices do not require bulky components for obtaining power, they may have a  
31 flexible threadlike conformation, facilitating deep implantation by injection.

32 **Methods:** We report the design and evaluation of advanced prototypes based on the above approach. The  
33 system consists of an external unit, floating semi-implantable devices for sensing and stimulation, and a  
34 bidirectional communications protocol. The devices are intended for their future use in acute human trials to  
35 demonstrate the distributed paradigm. The technology is assayed *in vitro* using an agar phantom, and *in vivo* in  
36 hindlimbs of anesthetized rabbits.

37 **Results:** The semi-implantable devices were able to power and bidirectionally communicate with the external  
38 unit. Using 13 commands modulated in innocuous 3 MHz HF current bursts, the external unit configured the  
39 sensing and stimulation parameters, and controlled their execution. Raw EMG was successfully acquired by the  
40 wireless devices at 1 kbps.

41 **Conclusions:** The demonstrated approach overcomes key limitations of existing neuroprostheses, paving the  
42 way to the development of distributed flexible threadlike sensors and stimulators. To the best of our knowledge,  
43 these devices are the first based on WPT by volume conduction that can work as EMG sensors and as electrical  
44 stimulators in a network of wireless devices.

## 45 **Keywords**

46 wireless power transfer, volume conduction, AIMDs, bidirectional communications, electromyography, sensor,  
47 electrical stimulation.

## 48 **I. Background**

49 Clinically available neuroprostheses have been demonstrated to improve the quality of life of patients with  
50 neurological disorders or injuries, as these individuals gain significant functional improvement [1]. Additionally,  
51 some neuroprosthetic technologies have granted the possibility to perform intuitive control of robotic prostheses  
52 as they create an interface between the machine and the patient's nervous system [2].

53 In the framework of the EXTEND collaborative project, funded by the European Commission and in which the  
54 authors participate, it has been defined the concept of Bidirectional Hyper-Connected Neural Systems (BHNS).

55 The BHNS concept refers to systems consisting of minimally invasive communication links between multiple  
56 nerves or muscles in the body and external devices which may be interconnected between them (Fig. 1). The  
57 concept requires the deployment of dense networks of wireless active implantable medical devices (AIMDs) that  
58 can perform distributed electrical stimulation and sensing. These wireless AIMDs must communicate in real time  
59 with external devices and tools that process and analyze the neuromuscular activity and control the stimulation  
60 and the action of machines. BHNS could, for example, be used for 1) tremor management in essential tremor and  
61 Parkinson's disease by tremor prediction using electromyography (EMG) [3], and subsequent intramuscular  
62 stimulation [4]; 2) performing functional neuromuscular stimulation [5]; or 3) interfacing with assistive wearable  
63 robots for spinal cord injury (SCI) and interfacing with prostheses providing control and artificial sensory  
64 feedback [6].

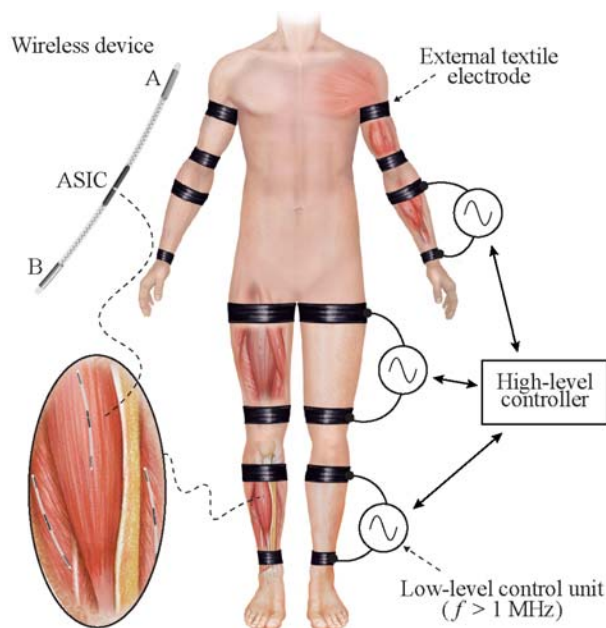

65  
66 **Fig. 1. Schematic representation of a Bidirectional Hyper-Connected Neural System – BHNS.** High frequency (> 1 MHz) volume conduction is used to  
67 wirelessly power and communicate with implantable devices for sensing and stimulation. The high-level controller of the external system communicates  
68 with several low-level control units that deliver current bursts through external textile electrodes. The envisioned wireless implantable devices will have a  
69 thread-like conformation to facilitate their deployment by injection. These devices will consist of a flexible body with two electrodes at their opposite ends  
70 (Electrodes 'A' and 'B') and their electronics will be integrated in an ASIC.

71  
72 Most neuroprostheses for chronic use, which are required to accomplish the BHNS concept, are implantable  
73 systems that consist of a central unit electrically connected to electrodes at target sites (e.g., cuff electrodes on  
74 peripheral nerves) by means of leads (i.e., wires) [7,8]. However, these neuroprostheses present limitations that  
75 restrict their use. Those limitations, which are most detrimental in the case of motor neuroprostheses, often arise

76 from their bulkiness and the need to perform complex surgical implantation procedures because of the leads [1,9].  
77 The leads also tend to fail due to mechanical stress, particularly in the case of motor neuroprostheses because  
78 electrodes are commonly deployed in long and mobile anatomical regions. As an alternative to these AIMDs  
79 based on central units, for the case of motor neuroprostheses, it was proposed and assayed the development of  
80 distributed networks of wireless intramuscular microstimulators that integrate the electronics and the electrodes  
81 [10,11]. The devices communicate with external systems to perform neuromuscular stimulation aiming at motor  
82 restoration in patients suffering from motor paralysis [12]. The microstimulators were percutaneously implanted  
83 via injection, thereby avoiding complex surgeries. However, the devices were stiff and considerably large  
84 (diameters > 2 mm), making them unsuitable for their use in a dense network of wireless microstimulators.

85 The form factor of these wireless devices is mostly limited by the method used to power them. Batteries, with  
86 their intrinsic limited lifespan and large volume [13], are not suitable as primary sources of power in very small  
87 electronic implants. These floating implants, in clinical use or preclinically demonstrated, are typically powered  
88 by means of wireless power transfer (WPT) methods such as inductive coupling - the most established WPT  
89 method - [14–17], ultrasonic acoustic coupling [18–20] and capacitive coupling [21–23]. These methods have  
90 obtained high miniaturization levels, at the expense of link efficiency, penetration depth, or functionality. Recent  
91 reviews on these methods can be found in [13,24–26].

92 In the last years we have proposed and demonstrated very thin microstimulators whose operation is based on  
93 rectification of volume conducted innocuous high frequency (HF) current bursts to cause local low frequency  
94 currents capable of stimulation [27,28]. A portion of the HF current picked up by the devices is not directly  
95 rectified to perform stimulation but used to power the electronics of the implant (e.g., for control and  
96 communications) and, in this sense, it can be understood that the implants employ WPT based on volume  
97 conduction. In fact, in a series of recent works, we have advocated for, and studied, the use of volume conducted  
98 HF current bursts applied through textile electrodes to power elongated implants in general, not only stimulators  
99 [29–31]. Remarkably, according to the approach we propose, the implants can be conceived as thin, flexible and  
100 elongated devices suitable for implantation by means of injection [27]. The approach uses the body as an  
101 electrical conductor of innocuous and imperceptible HF current bursts that are applied by an external system using  
102 external textile electrodes. The implants do not require bulky components within their body to be electrically fed,  
103 allowing the integration of the electronics in an application-specific integrated circuit (ASIC). They pick up a

104 small portion of the energy available through their two electrodes located at the opposite ends of the implant. The  
105 energy is used to power and bidirectionally communicate with the external system (Fig. 1). The elongated and  
106 ultrathin form factor allows the deployment of multiple implants in a single body region, favoring their use in  
107 dense networks of wireless AIMDs, such as those required by BHNS.

108 In the general architecture of BHNS, the external system will consist of one top-level controller that  
109 communicates with the wireless AIMDs through several external low-level control units that act as bidirectional  
110 gateways (i.e., protocol translators) between the implants and the external controller (Fig. 1). The low-level units  
111 apply bursts of HF currents to power and communicate with the wireless devices.

112 In Becerra-Fajardo et al. [27] we reported the development and *in vivo* evaluation of semi-rigid, thin and  
113 addressable stimulators based on this WPT approach. The injectable devices were made only of off-the-shelf  
114 components, and had an overall diameter of 2 mm. Although successfully demonstrated in animals, due to their  
115 invasiveness, these devices are not adequate to conduct assays in humans. Therefore, to be able to acutely  
116 demonstrate in humans the feasibility of the BHNS concept, within the framework of the EXTEND project it was  
117 decided to develop semi-implantable devices that consist of ultrathin and short intramuscular electrodes, made  
118 with thin-film technology, that are connected to a miniature electronic circuit to be fixed on the skin. Not only the  
119 electronics of the devices were upgraded for EMG sensing [32] but they were also upgraded for communication  
120 capabilities. Here we report the development and evaluation of these semi-implantable devices and the external  
121 system that powers and controls them. To the best of our knowledge, the wireless devices presented here are the  
122 only devices based on WPT by volume conduction that can work both as EMG sensors and as electrical  
123 stimulators to form networks of wireless devices.

## 124 **II. Methods**

### 125 **1. Developed system**

126 The two fundamental parts of the developed system are 1) the external system that delivers the HF current  
127 bursts for wireless powering and bidirectional communications from the external system to the floating semi-  
128 implantable devices (i.e., downlink), and from these devices to the external system (i.e., uplink), and 2) the  
129 floating devices. These floating devices are semi-implantable devices composed of intramuscular electrodes  
130 connected to a miniature external electronic circuit (Fig. 2). The external system, through the two external textile

131 electrodes of a specific low-level control unit, delivers HF current bursts that power the floating devices located  
132 between the textile electrodes. Using the same HF current bursts, the control unit sends commands to the wireless  
133 devices to operate them, and, depending on the command, delivers HF currents that are modulated by the wireless  
134 devices to generate an uplink reply.

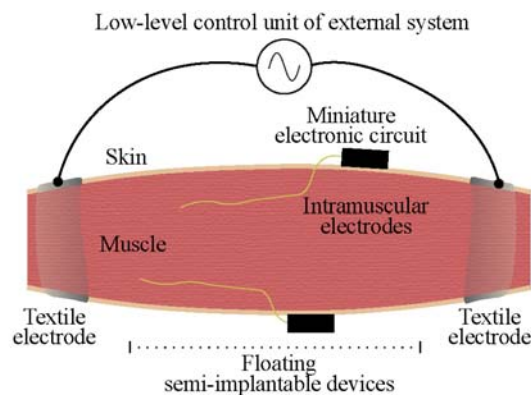

135  
136 **Fig. 2. Schematic representation of the floating semi-implantable devices used for acute implantation, and a low-level control unit of the external**  
137 **system.** The semi-implantable devices include injectable intramuscular electrodes and a miniature electronic circuit adhered to the skin. The low-level unit of  
138 the external system delivers HF current bursts for powering, EMG sensing and electrical stimulation.

139  
140 **1.1. External system**  
141 *1.1.1. Hardware*  
142 The external system integrates a low-power PC/104 single board computer (CMA34CRQ2100HR by RTD  
143 Embedded Technologies, Inc) acting as a high-level controller that can communicate with several low-level units.  
144 The basic architecture of the low-level control units is shown in Fig. 3. The units include a small single-board  
145 computer - hereinafter “digital unit” - (Raspberry Pi 4 2G Model B, by Raspberry Pi Foundation) that controls the  
146 delivery of the HF current bursts and the bidirectional communications. They also include a HF generator and  
147 modulator (4064 by B&K Precision, Corp.) connected to a custom-made power amplifier consisting of five high  
148 voltage amplification modules, based on a high speed, high voltage operational amplifier (ADA4870 by Analog  
149 Devices, Inc.), which are connected in series through transformers. The output of the power amplifier is connected  
150 to a sensing resistor, and to a pair of textile electrodes attached to the skin. The sensing resistor, acting as a shunt  
151 resistor, is used by a custom-made demodulator for measuring the current flowing through the tissues. This  
152 current is monitored by the digital unit, especially during uplink, when the floating devices modulate their current  
153 consumption, creating minute variations in the current. Fig. 3 shows a schematic representation of the modulating

154 signal and resulting modulated signal for downlink and power bursts (blue waveforms), the voltage obtained  
155 across the sensing resistor, which corresponds to a downlink and an uplink section, and the corresponding  
156 demodulated uplink data (red waveforms). For illustration purposes, the uplink modulation index used in the  
157 scheme is 10%, higher than the < 1% modulation index of the load modulation performed by the floating devices.  
158 The load modulation scheme is explained below.

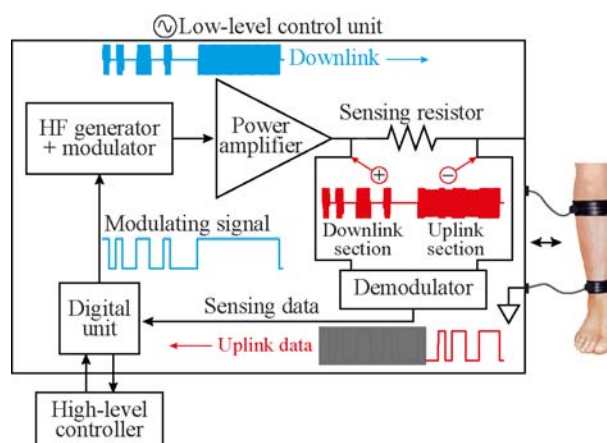

159  
160 **Fig. 3. Basic architecture of the low-level control unit.** The unit is governed by the high-level controller and communicates with the wireless devices  
161 located in the tissue between the two external electrodes of the control unit. The device includes a digital unit that generates a modulating signal for a HF  
162 generator and modulator. The modulated HF current - carrying downlink information and bursts of power - is amplified and applied to the tissues through the  
163 external textile electrodes (blue waveforms). This same current is continuously monitored by the digital unit through a sensing resistor and a demodulator, to  
164 detect and decode minute current variations (< 1 %) generated when the wireless devices do uplink (red waveforms).

165 For experimental convenience, in the present study the reported assays were performed without using the  
166 PC/104 single board computer as the top control device: the Raspberry Pi 4 acting as the digital unit was  
167 commanded through the Ethernet interface from a computer running Matlab (R2019b, by Mathworks, Inc). This  
168 computer acted as the high-level controller.

169 Through its universal asynchronous receiver-transmitter (UART) port, the digital unit of the low-level unit  
170 (i.e., the Raspberry Pi 4) generates an amplitude-shift keying (ASK) signal to modulate the HF current bursts for  
171 downlink communications and for powering the wireless devices. For uplink communications, the digital unit  
172 reads the information amplified and filtered by the demodulator using the UART interface. For both downlink and  
173 uplink, the information is sent at a rate of 256 kbps. This implies that each byte has a duration of 39.06  $\mu$ s (1 start  
174 bit + 1 byte + 1 stop bit).

### 175 1.1.2. HF bursts for power

176 The external system delivers an initial long HF sinusoidal burst coined “Power up”. This 30 ms burst is  
177 required to power up the wireless devices located between the two external electrodes. After this, the wireless

178 devices are kept energized, and running in an idle mode, by delivering short bursts with a repetition frequency ( $F$ )  
179 of 50 Hz, and a duration ( $B$ ) of 1.6 ms. As later explained, the EMG analog front-end (AFE) of the wireless  
180 devices saturates during the burst. The repetition frequency and duration of these bursts is selected to 1) minimize  
181 their impact in the EMG front-end, favoring faster recovery from saturation and longer windows in-between  
182 bursts that can be used for EMG acquisition; 2) obtain a duty cycle ( $D$ ) that is low enough to avoid tissue heating,  
183 and 3) deliver enough energy to keep the semi-implantable devices powered.

### 184 *1.1.3. Digital communications*

185 A communication protocol stack structured in layers and based on the Open System Interconnection (OSI)  
186 model, has been created for performing the bidirectional communications between the external system and the  
187 wireless devices. The protocol was created to ensure that the minimum required data frames were used in the  
188 downlink and uplink, minimizing the time the HF bursts are active. The active time of the HF bursts is related  
189 with the specific absorption rate (SAR), which is limited by safety standards (explained below).

190 The application layer implemented in this protocol stack includes 13 different downlink commands to control  
191 (e.g., configure EMG acquisition and stimulation) and interrogate (e.g., ping, get samples) the wireless devices.  
192 The frames that encapsulate the commands and the replies used in the bidirectional communications are encoded  
193 employing Manchester coding, which offers two advantages: has no dc component to avoid charge injection when  
194 applying the HF current bursts, and it provides a first error detection mechanism. Other additional error detection  
195 mechanisms are parity bit, frame length and command code.

196 A detailed description of the process performed by the external unit to command the wireless devices, request  
197 replies, and the timings used to deliver the HF current bursts is included in Supplementary Methods,  
198 Supplementary file 1. All downlink commands and uplink replies are preceded by one initialization byte. That is,  
199 each frame consists of one initialization byte followed by one or more bytes containing the information. All  
200 uplink replies are preceded by a downlink command. Between one downlink command (e.g., Get sample) and the  
201 corresponding uplink reply (e.g., Send sample) there is a period of 2.3 ms in which no bursts are delivered by the  
202 external system. This time is required for processing purposes inside the wireless device.

203 Supplementary Table 1, Supplementary file 1, reports the downlink commands included in the communication  
204 protocol stack, as well as the estimated transmission time required for them. The protocol allows to control up to  
205 256 wireless devices located between two external electrodes. To avoid replicating the instructions to several



206 wireless devices, the protocol enables the use of 256 groups of devices that can be configured simultaneously, or  
207 that can be requested to do a specific function (e.g., start sensing or stop sensing). This minimizes the delivery of  
208 HF bursts for downlink and avoids misusing the powering/communication channel.

209 The stimulation and sensing configuration payloads of the communication protocol stack are reported in  
210 Supplementary Table 2, Supplementary file 1.

211 Supplementary Table 3, Supplementary file 1, reports the uplink replies, description and timings used by the  
212 wireless devices to send information to the external system. The replies either correspond to 1) an acknowledge  
213 (ACK), 2) a sample or 3) the configuration information currently defined in the wireless device. When the  
214 external system sends a “Get configuration” request, the uplink frame is constructed using the same format as in  
215 the downlink. In the case of “Get sample” and “Retry sample”, the device replies with a frame consisting of 10  
216 bits corresponding to the sample, and 2 more bits corresponding to an internal counter, which is used to control  
217 the correct uplink of samples.

#### 218 *1.1.4. Compliance with electrical safety standards*

219 ICNIRP and IEEE standards define safety levels with respect to human exposure to electromagnetic fields.  
220 These standards protect against health effects related to tissue heating [33,34]. Heating limits are expressed by the  
221 standards in terms of the SAR, which can be related to the electric field at a point as:

$$SAR = \frac{\sigma |E_{rms}|^2}{\rho} \quad (1)$$

222 where  $\sigma$  is the conductivity of the tissue (S/m),  $\rho$  is the tissue density (kg/m<sup>3</sup>), and  $E$  is the electric field strength  
223 in tissue (V/m) averaged over 6 minutes for local exposure. By applying the HF sinusoidal currents in the form of  
224 short bursts, the applied  $E_{rms}$  is:

$$E_{rms} = \frac{E_{peak}\sqrt{D}}{\sqrt{2}} \quad (2)$$

225 where  $E_{peak}$  is the applied peak electric field (V/m), and  $D$  is the duty cycle. In the case of periodic bursts  
226 (frequency  $F$ ; duration  $B$ ), as is the case of the power maintenance bursts,  $D$  is equal to  $F \cdot B$ .

227 Equation (2) allows to calculate the applied  $E_{rms}$  and SAR in terms of the Power up time, and the types of  
228 functions requested by the external system, including the commands sent in the downlink, and the information  
229 replied in the uplink. Supplementary Tables 1 and 3, Supplementary file 1, can be used to calculate the duty cycle  
230 corresponding to the commands used in a bidirectional sequence. The duty cycle can be calculated as:

$$D = \frac{t_{Power\ up} + t_{act\_comm} + t_{act\_maint}}{t_{averaging}} \quad (3)$$

231 where  $t_{Power\ up}$  is the Power up time (i.e., 30 ms),  $t_{act\_comm}$  corresponds to the active time of the commands, both  
232 downlink and uplink,  $t_{act\_maint}$  corresponds to the active time of the power maintenance bursts (which have a duty  
233 cycle equal to  $F \cdot B$ ), and  $t_{averaging}$  is the averaging time of the rms (360 s, equivalent to the 6 minutes averaging time  
234 established for the SAR calculation). The duration of the power maintenance bursts is equivalent to  $t_{averaging}$  minus  
235 the total time used for Power up and bidirectional commands.

236 In the case of human limbs, the standards define a maximum SAR of 20 W/kg for persons in restricted  
237 environments at frequencies below 6 GHz, averaged over 10 g cube of tissue [33,34].

## 238 **1.2. Wireless devices for EMG sensing and electrical stimulation**

239 The wireless devices are composed of thin and flexible intramuscular electrodes made in thin-film technology,  
240 a miniature electronic circuit with off-the-shelf components, and an intermediate printed circuit board (PCB) that  
241 connects both parts.

### 242 *1.2.1. Intramuscular electrodes*

#### 243 *1.2.1.1. Active sites design*

244 The intramuscular electrodes are based on similar thin-film electrodes reported in [35], which are intended for  
245 acute implantation. To define the geometry of the electrode contacts (i.e., the active sites, the actual electrodes  
246 strictly speaking), simulations were performed to test the ability of the electrodes to 1) obtain enough power to  
247 supply the wireless circuit for continuous EMG recording, and 2) generate stimulation pulses with amplitudes  
248 above 2 mA and below 4 mA. Other functions performed by the circuit were not evaluated as they require less  
249 power than that needed during EMG acquisition and electrical stimulation. The simulations were performed by  
250 modeling the tissues surrounding the intramuscular electrodes and the presence of the electric field applied by the  
251 external system using a Thévenin equivalent circuit [29]. See Supplementary Methods, Supplementary file 1, for  
252 details of the numerical methods for the intramuscular electrodes design.

253 Besides power supply and current delivery capabilities, another aspect that was considered in the geometrical  
254 design of the active sites was the charge injection limit. If the applied pulses exceed the maximum charge  
255 injection capacity of the electrodes, irreversible reactions may occur, which can cause damage both to the  
256 electrodes and to the tissues. In the case of smooth platinum, the charge injection capacity is defined in the range

257 between 50 and 150  $\mu\text{C}/\text{cm}^2$  for 200  $\mu\text{s}$ , biphasic, charge-balanced pulses [36]. In the case of microrough  
258 platinum, the charge injection capacity increases to 500  $\mu\text{C}/\text{cm}^2$  [37].

#### 259 1.2.1.2. Final conformation

260 The final geometry of the electrodes is based on the results obtained with finite element method (FEM)  
261 simulations and with circuit simulations performed with SPICE. Both are described in Supplementary Methods,  
262 Supplementary file 1. The polyimide filament that contains the electrode contacts and the tracks has a width of  
263 0.42 mm, a length of 81.6 mm, and a thickness of 0.02 mm (Fig. 4 (a)). Between the centers of the contacts there  
264 is a distance of 30 mm, and the contacts have a length of 7.5 mm and a width of 0.265 mm (Fig. 4 (b)). The edges  
265 of the contacts are rounded to avoid sharp corners that would lead to high current densities. The four electrode  
266 contacts are located on both faces of the filament: 2 contacts in the top layer, and 2 contacts in the bottom layer.  
267 The distal contacts (top and bottom) are electrically connected in the miniature electronic circuit, to use them as a  
268 single distal electrode with a total surface area of 3.8  $\text{mm}^2$ . This electrode, coined Electrode ‘A’ (Fig. 4 (a)), is the  
269 stimulation electrode when the semi-implantable device is in stimulation mode. The two proximal contacts (top  
270 and bottom) are also short-circuited, to use them as a single proximal electrode (Electrode ‘B’, return electrode in  
271 stimulation mode) with a total surface area of 3.8  $\text{mm}^2$ . Electrodes ‘A’ and ‘B’ are used as the inputs for the EMG  
272 analog front-end (AFE) and are indirectly used by the load modulator during uplink. Both circuits are explained  
273 below.

274

275

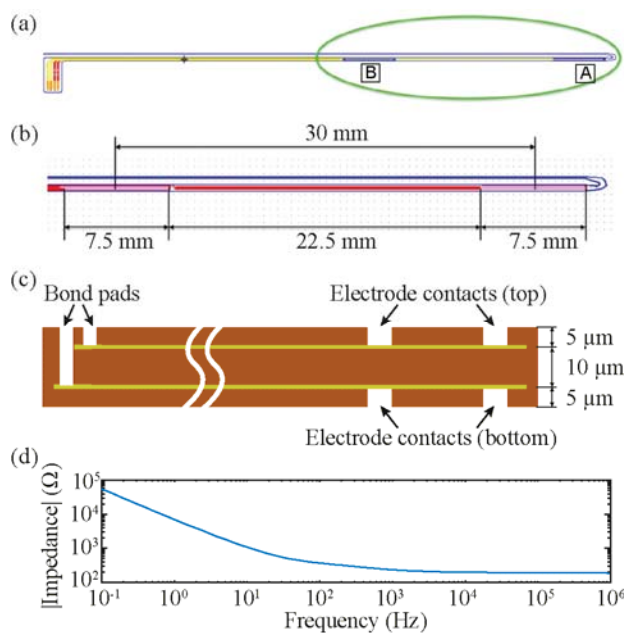

276

277 **Fig. 4. Intramuscular electrodes.** (a) Top view of the electrodes showing a distal contact (Electrode 'A'), a proximal contact (Electrode 'B'), and  
278 the bonding pads of the four electrode contacts. (b) Detail of the area where the distal and proximal electrodes are located. (c) Cross section of the intramuscular  
279 electrodes (not to scale). Gold and platinum are used as metallization layers for the electrode tracks and contacts (600 nm thick per layer), and polyimide is  
280 used as substrate and cover material. (d) Impedance measurement of the intramuscular electrodes in a bipolar arrangement (short circuited distal contacts  
281 against short circuited proximal contacts) in a 0.9% NaCl solution.

282

283 Fig. 4 (c) shows the construction of the intramuscular electrodes. In essence it consists of a polyimide substrate  
284 (thickness: 10 µm) with a patterned metallization on both sides and a thin polyimide coating (thickness: 5 µm) on  
285 both sides with openings for the active sites and the bonding pads. The metallization is uniform, that is, it is the  
286 same metallization both for the active sites and for the connection tracks from these to the bonding pads. A  
287 relatively thick layer of gold (450 nm) beneath the platinum layer (150 nm) wires ensures high conductivity for  
288 the tracks. Microrough platinum coating is used to increase the surface area of the electrodes, therefore increasing  
289 their charge injection capacity and improving power transfer.

290 As the proximal end of the thin-film electrodes is connected to the external miniature electronic circuit, they  
291 have the same implantation limitation as those used in [35,38]: the intramuscular electrodes cannot be implanted  
292 directly using a hypodermic needle as introducer, because the circuit would prevent the complete extraction of the  
293 needle after insertion. To overcome this drawback, the distal end of the filament containing the four electrode  
294 contacts has a U-shape structure with a guiding filament (Fig. 4 (b)) that facilitates the insertion of the electrodes  
295 in the muscle. The main filament with the active sites runs externally to the needle, while the thin guiding filament  
296 is inserted through the lumen of a 23 G hypodermic needle (Sterican 4665600 by B. Braun Melsungen AG)

297 having a length of 60 mm and an outer diameter of 0.6 mm. The end of the guiding filament is adhered to the Luer  
298 lock of the needle. To reduce the risk that the needle bevel cuts the guiding filament during implantation, the  
299 bevel is smoothed with a laser (Picco Laser, by O.R. Lasertechnologie, Germany) prior to inserting the guiding  
300 filament inside the needle.

301 The small intermediate PCB is used for 1) doing the electroplating process to coat the electrode contacts with  
302 microrough platinum [39], and 2) connecting the injectable electrodes to the miniature electronic circuit. The  
303 polyimide electrodes are bonded to the PCB using the Microflex technology to achieve an electrical and  
304 mechanical connection [40]. After electroplating, the circuit of the semi-implantable device is stacked on top of  
305 the small PCB via surface-mount vertical headers, and the final electronic assembly is protected within a 3D  
306 printed housing (Fig. 5).

307

308

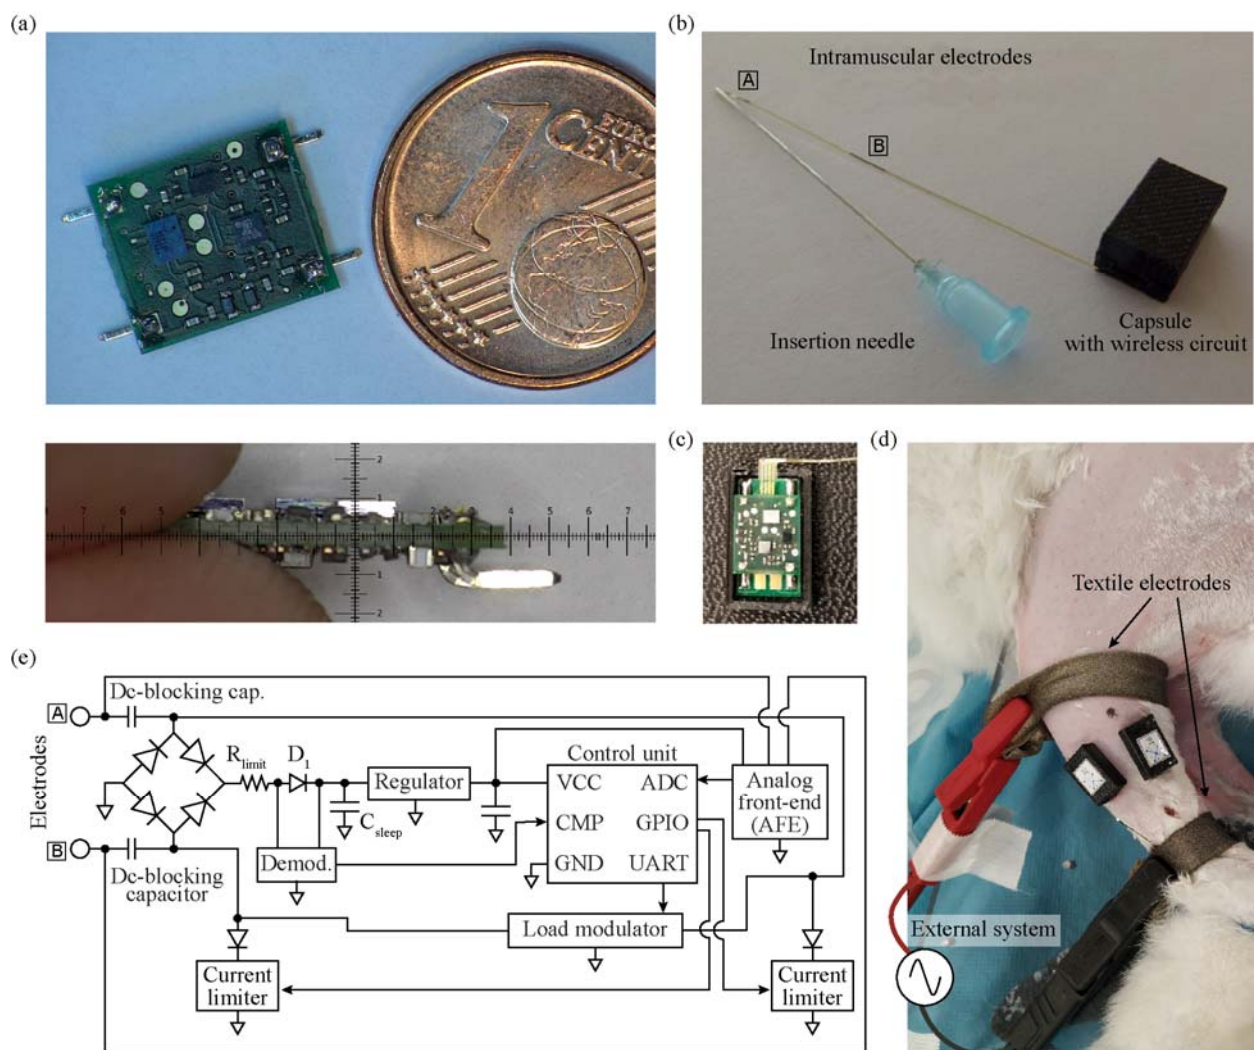

309

310 **Fig. 5. Wireless device composed of intramuscular electrodes and miniature electronic circuit.** (a) Top: circuit board (length: 10 mm),  
 311 with four headers for their connection to the 4 electrode contacts of the intramuscular electrodes. Bottom: lateral view of the circuit (height: 2.4 mm). (b)  
 312 Final conformation of the wireless device, including intramuscular electrodes and capsule protecting circuit. The guiding filament of the electrodes is  
 313 inserted in the lumen of the insertion needle. (c) Circuit housed in a polymer capsule, connected to the intramuscular electrodes using a small PCB. (d)  
 314 Image of rabbit's hindlimb with two wireless devices implanted in the tibialis anterior and gastrocnemius medialis muscles. (e) Basic architecture of the  
 315 wireless circuit shown in (a).

316

### 317 1.2.2. Miniature electronic circuit

318 The electronic architecture of the wireless device used for sensing and stimulation and which is powered and  
 319 operated by HF volume conduction is partially based on [27]. Yet the architecture presented here has several  
 320 advantages over the design reported in the past, including better power efficiency, bidirectional communications  
 321 with higher data rates, the integration of an AFE for EMG acquisition, an ultra-low power microcontroller with  
 322 several peripherals and running a finite-state machine, and a communication protocol stack (described above) for  
 323 a more robust control from the external system.

324 The electronic circuit has a length of 10 mm, and a width of 8 mm. The surface-mount vertical headers shown  
325 in Fig. 5 (a), connect the circuit to the intermediate PCB that includes the intramuscular electrodes. The final  
326 conformation of the wireless device, including the insertion needle and the capsule to protect the wireless circuit,  
327 is shown in Fig. 5 (b).

#### 328 1.2.2.1. Power regulation and dc-blocking

329 Fig. 5 (e) shows the basic architecture of the electronic circuit. The distal and proximal electrodes of the  
330 polyimide filament are connected to the electronic circuit through two dc-blocking capacitors, which are aimed to  
331 prevent dc currents that can damage both the tissues and the electrodes [41]. A bridge rectifier based on four  
332 Schottky diodes (RB521ZS-30 by ROHM Co., Ltd.) provides full-wave rectification for the HF current picked up  
333 by the intramuscular electrodes. A limiting resistor followed by a Schottky diode ( $D_1$ ), and a set of three  $2.2 \mu\text{F}$   
334 capacitors connected in parallel ( $C_{\text{sleep}}$ ) provide a smoothed input for a low-dropout linear regulator  
335 (ADP7112ACBZ-2.5 by Analog Devices, Inc.). The output of this regulator is connected to a set of two  $10 \mu\text{F}$   
336 capacitors connected in parallel. This provides a stable dc voltage for the control unit and the rest of the  
337 electronics during and in-between HF bursts. Sets of capacitors connected in parallel are used instead of single  
338 capacitors to ensure a proper capacitance and voltage rating in a miniature surface-mount package.

#### 339 1.2.2.2. Control unit

340 The wireless electronic circuit is controlled by an ultra-low power microcontroller (MKL03Z32CAF4R by  
341 NXP Semiconductors N.V.) with an Arm Cortex M0+ core. This  $2 \text{ mm} \times 1.6 \text{ mm}$  microcontroller is larger than  
342 that of [27], but includes several peripherals required by the circuit, a much lower power-up time, several low-  
343 power modes, and more general-purpose input/output (GPIO) pins. The integrated high-speed comparator is used  
344 as the final stage of the downlink demodulator (explained below), and its output is connected to the integrated  
345 low-power UART receiver for further decoding. The UART transmitter generates the modulating signal for the  
346 load modulator used for uplink communications. Two digital outputs of the GPIO pins are used to control the  
347 switches of the current limiters for electrical stimulation, and the analog-to-digital converter (ADC) is used as the  
348 last stage of the AFE. Both circuits are described below. Finally, a low-power timer is used to control the  
349 sampling times during sensing, and to control the time-outs of the software.

350 The control unit is configured to have three types of power consumption states: 1) idle mode, when the implant  
351 is waiting for commands from the external system, 2) processing and basic operations mode, when the implant

352 decodes and processes the information coming from the external system and performs uplink communications and  
353 stimulation, and 3) sensing mode, when the implant is acquiring EMG activity and most of the peripherals of the  
354 microcontroller are powered. The change of state is defined by the information received from the external system  
355 during downlink. The control unit is usually kept in a very-low power standby state (i.e., idle mode) to maintain  
356 the wireless circuit energized, avoiding the need to deliver a long Power up HF burst to power-up the  
357 microcontroller in-between bursts. Since the circuit lacks an active power source as a battery, it naturally shuts  
358 down at any time by disabling the bursts of HF current applied by the external system.

359 The initialization byte sent by the external system is used by the control unit as the source for a hardware-  
360 based automatic wake-up matching, to wake up from the idle mode and go into the processing and basic  
361 operations mode. In the case the byte received matches the wake-up code already defined in the firmware, the  
362 wireless device wakes up and waits for the next byte with information to decode. The information includes the  
363 address of the wireless device or group of devices, and the command sent to it.

#### 364 1.2.2.3. Downlink demodulation and uplink modulation

365 For downlink, a demodulator was designed consisting of two voltage dividers whose outputs are connected to  
366 the inputs of a high-speed comparator integrated in the control unit. The output of the first voltage divider  
367 corresponds to the envelope of the downlink signal modulated in the HF current burst. The second voltage divider,  
368 which is connected immediately after the Schottky diode  $D_1$ , behaves with the set of 2.2  $\mu\text{F}$  capacitors as a  
369 low-pass filter, creating a threshold proportional to the output of the first voltage divider. In other words, even if  
370 the amplitude obtained across the intramuscular electrodes varies due to fluctuations in the electric field applied  
371 by the external system, the outputs of both voltage dividers maintain their proportionality. The downlink signal is  
372 used for 1) receiving data at a rate of 256 kbps or 2) receiving triggers to wake up the control unit using the  
373 synchronization byte or perform a function as uplink communications.

374 The uplink is based on load modulation using on-off keying. The external system applies a HF current burst,  
375 which is detected by the wireless devices to do their specific uplink sequence. Supplementary Methods,  
376 Supplementary file 1 describes the uplink sequence as well as the timings required for each type of reply (e.g.,  
377 ACK, send configuration, send sample). The floating device identifies this burst, starting the uplink section shown  
378 in Fig. 3. Its control unit generates a 256 kbps Manchester-encoded modulating signal with its UART  
379 transmitter. This modulating signal is used to command a set of transistor switches that short-circuit the inputs of



380 the full-wave rectifier (Fig. 5 (e)). This results in virtually short-circuiting Electrodes ‘A’ and ‘B’, thus  
381 modulating the current consumption of the wireless device. These minute variations in consumption are seen in  
382 the sensing resistor of the external system during the uplink section (Fig. 3, red waveforms), and are then  
383 demodulated and decoded by the digital unit. Load modulation is completely innocuous to the tissue: there is no  
384 electrical stimulation generated when uplink is performed. As a risk mitigation strategy, the load modulator is  
385 connected to the intramuscular electrodes through the dc-blocking capacitors.

#### 386 1.2.2.4. EMG analog front-end (AFE)

387 One of the most challenging characteristics of the wireless device proposed here is the use of only two  
388 electrodes (Electrodes ‘A’ and ‘B’) for powering, bidirectional communications, electrical stimulation, and EMG  
389 sensing. As the wireless device powers from the volume-conducted alternating HF currents, very little  
390 consumption imbalances during the positive and negative semicycles may slightly charge the electrodes during  
391 these episodes, saturating the EMG amplifier. For this reason, the input of the EMG amplifier avoids the use of  
392 high dc-blocking capacitances that could prolong such saturation beyond the burst. Fig. 6 shows the basic  
393 architecture of the designed EMG amplifier. A four-resistor difference amplifier with a gain of 18.4 dB was  
394 designed based on a micropower operational amplifier (ADA4505 by Analog Devices, Inc). The amplifier is  
395 biased using a split resistor ( $R_f/2$ ), and a capacitor is added to each amplifier input, to act with the input resistors  
396 ( $R_{IN}$ ) as a first low-pass filter. A Zener diode clipper is included in both inputs of the operational amplifier for  
397 protection. The difference amplifier is followed by cascaded active band-pass filters with a bandwidth of 1 kHz.  
398 The overall gain of the AFE is 54 dB, and its output is connected to the ADC of the control unit, which is  
399 configured at a resolution of 10 bits.

400

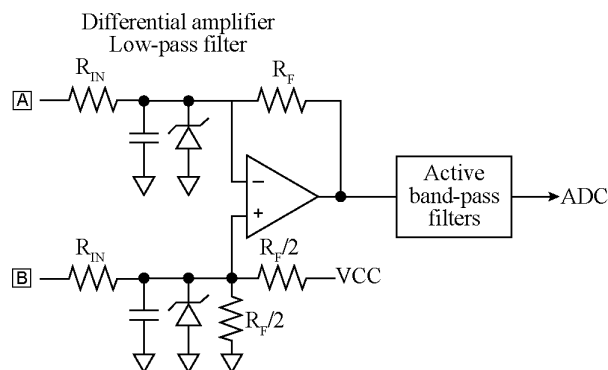

401

402 **Fig. 6. Basic architecture of the AFE designed for the wireless device.** The input of the AFE is the same pair of electrodes used for powering,  
403 communication and electrical stimulation

404 During EMG sensing, the control unit is constantly monitoring when a HF burst is applied by the external  
405 system using the high-speed comparator. When this happens, depending on the sampling frequency set by the  
406 external system, the control unit replaces the samples corresponding to this saturation with a constant value (e.g.,  
407 5 samples for a sampling frequency of 1 ksp/s). The number of samples to replace is implicitly set by the external  
408 system when configuring the sampling rate of the sensing mode. The replacement of the samples facilitates to  
409 identify the moments in which the AFE was saturated when the complete recording is uploaded to the external  
410 system, without misinterpreting the saturation with high amplitude EMG activity.

#### 411 1.2.2.5. Electrical stimulation

412 As mentioned above, the electrical stimulation mechanism of the wireless devices is based on the rectification  
413 of the volume conducted HF current bursts to cause local low frequency currents capable of stimulation. This is  
414 performed using two independent current limiters, each one connected to a Schottky diode (RB521ZS-30 by  
415 ROHM Co., Ltd.) that is connected to an electrode (Electrode 'A' or 'B') by means of a dc-blocking capacitor  
416 (Fig. 5 (e)). The architecture of the current limiter is explained in depth in the Supplementary Methods,  
417 Supplementary file 1. Each current limiter is connected/disconnected from the load (i.e., the tissue) using a switch  
418 based on a N-channel MOSFET (DMN2990UFZ by Diodes Incorporated) controlled by the control unit of the  
419 wireless device through one GPIO.

420 Using the communication protocol explained above, the external system configures the control unit to deliver  
421 either monophasic or biphasic stimulation pulses and the polarity of the pulse or pulses. The pulse width, number  
422 of stimulation pulses and frequency of stimulation are set by the external system using specific timings of the HF  
423 current bursts. The wireless device detects these bursts using its demodulator, and the control unit activates the  
424 current limiters accordingly. In the case of biphasic pulses, an interphase dwell is generated by the external  
425 system, which is automatically detected by the wireless device. In both monophasic and biphasic configurations,  
426 60  $\mu$ s after the stimulation sequence (i.e., a monophasic or biphasic pulse) is completed, a short HF current burst  
427 of 800  $\mu$ s is applied by the external system. This short burst is used by the wireless device to short-circuit the dc-  
428 blocking capacitors, clearing the charge that has accumulated in them in case there is a mismatch between the  
429 current limiters. In this way, passive charge balance is accomplished. Supplementary Methods, Supplementary file

430 1 shows a schematic representation of the activation of the current limiters according to the stimulation  
431 configuration defined by the external unit, and the resulting low-frequency contents of the current flowing through  
432 the wireless device.

## 433 2. *In vitro* validation

434 To evaluate the impedance of the intramuscular electrodes, a bipolar arrangement was implemented, in which  
435 the short circuited distal contacts (Electrode 'A') were measured against the short circuited proximal contacts  
436 (Electrode 'B'). An impedance measurement system (Autolab PGSTAT302N by Deutsche METROHM GmbH &  
437 Co. KG) was employed using this arrangement in a 0.9% NaCl solution. In addition, in a dry setup, the resistance  
438 between the electrode contacts and the PCB pads was measured using a hand-held multimeter (38XR-A by  
439 Amprobe Instrument Corporation).

440 The *in vitro* model used for the evaluation of the wireless device consisted in a 6.5 cm diameter agar cylinder  
441 made from a NaCl solution with a conductivity of 0.57 S/m, equivalent to that of muscle tissue at 3 MHz (Fig.  
442 7 (a)) [42]. The agar cylinder was cut longitudinally, and one side was placed on a 3D printed structure to ensure  
443 stability. The intramuscular electrodes were placed in a position such that the wireless circuit could lie just by the  
444 cylinder (Fig. 7 (b)). After carefully placing the second half of the cylinder over the electrodes, the agar phantom  
445 was held together with the use of two aluminum external electrodes (width: 1.5 cm), which were strapped around  
446 the cylinder at a distance of 12 cm. The aluminum electrodes were connected to the external system using high  
447 strength alligator clips (AK 2 S, by Hirschmann Test and Measurement).

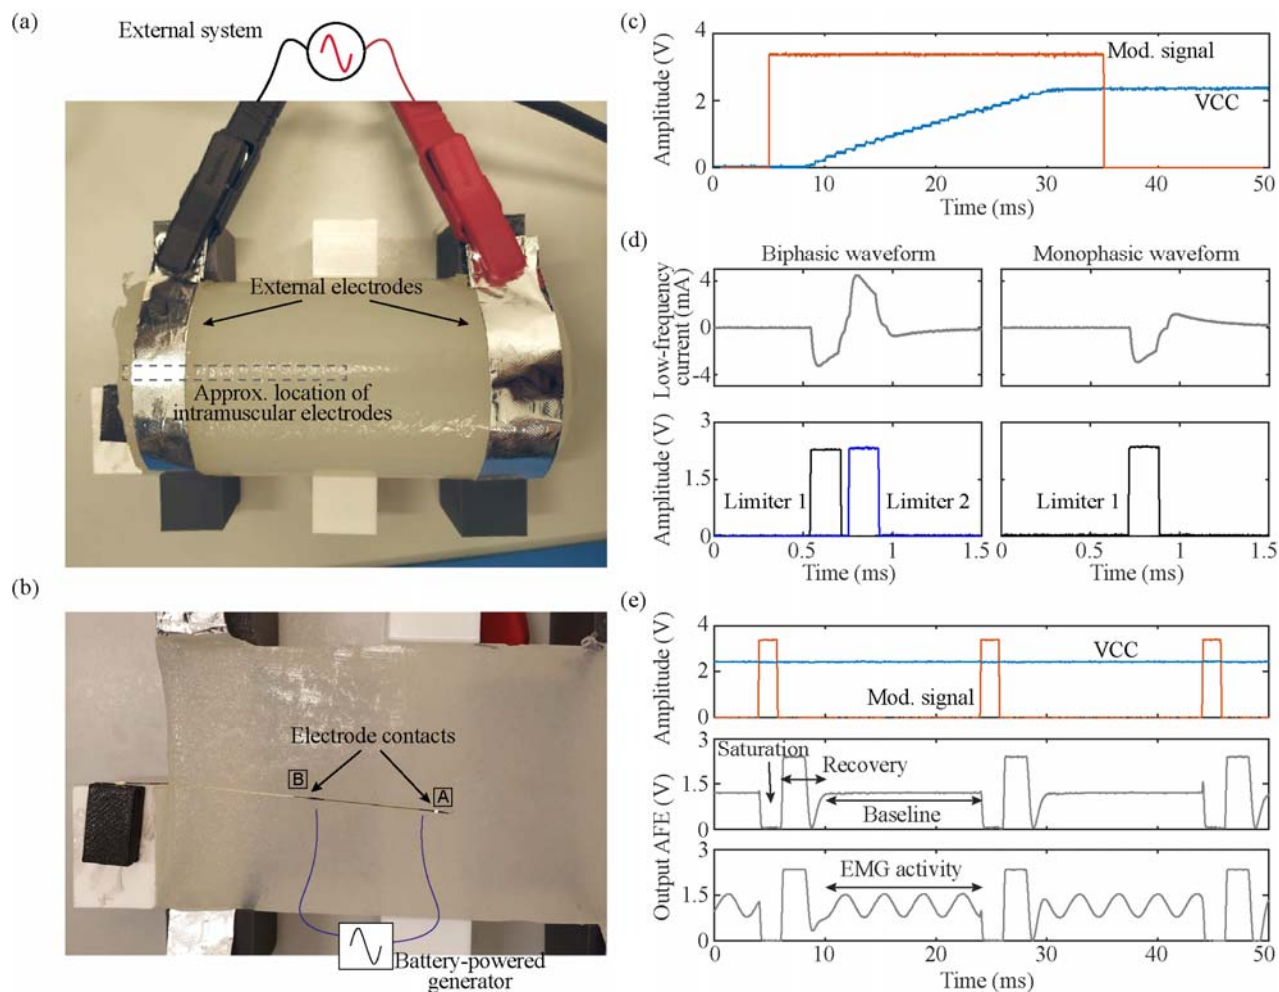

448

449 **Fig. 7. In vitro setup and results.** (a) Complete *in vitro* setup. (b) Detail of half the agar cylinder, showing the position of the intramuscular electrodes and  
 450 the wireless electronic circuit. The approximate location of the electrode wires connected to the battery-powered generator for EMG testing is shown in blue.  
 451 (c) Modulating signal of the external system (Mod. signal), and output of the wireless device's regulator (VCC), which is used to power the circuit's  
 452 electronics. A 'high' of the modulating signal corresponds to the delivery of HF currents. (d) Filtered biphasic and monophasic stimulation waveforms  
 453 obtained when the wireless device rectifies the HF current immediately after the external system triggers a stimulation. The current limiters of the circuit are  
 454 enabled/disabled by the control unit to obtain such waveforms. (e) Output of the AFE of the wireless device measured with an oscilloscope when no  
 455 sinusoidal signal is present, and when there is. The AFE saturates due to the HF currents applied by the external system (see corresponding modulating  
 456 signal), and recovers to have a stable state (baseline) for EMG acquisition. VCC is stable even if the HF current is applied in the form of bursts, and the  
 457 circuit is at its maximum power consumption.

458

459 For performing electrical measurements, the miniature wireless electronic circuit was replaced by a larger  
 460 evaluation board that included test points. In the case of stimulation, the proximal electrode (Electrode 'B') of the  
 461 circuit was connected to the parallel combination of a 10  $\Omega$  resistor and a 2.2  $\mu\text{F}$  capacitor. This measurement  
 462 circuit acts as a low-pass filter (LPF) (cutoff frequency: 7.2 kHz) for the current that flows through the  
 463 intramuscular electrodes, facilitating recording the low-frequency contents of the current flowing through the  
 464 wireless device. All the measurements were performed using a battery-powered oscilloscope (TPS2014 by  
 465 Tektronix, Inc.), except for the current consumption of the circuit, which was measured using a battery-powered

466 multimeter (38XR-A by Amprobe Instrument Corporation). The signals obtained with the oscilloscope were  
467 smoothed in Matlab (R2019b, by Mathworks, Inc) using a centered moving average filter with a window length of  
468 5 samples.

469 To test the capability of the wireless circuit to acquire EMG, a low frequency potential dipole was created in  
470 the saline agar cylinder by connecting a battery-powered sinusoidal generator (72-505 by Tenma Test Equipment)  
471 to two kynar-insulated silver plated copper wire electrodes (exposed length: 3.65 mm, diameter: 0.25 mm). The  
472 wire electrodes were inserted into the cylinder with a separation distance of approximately 30 mm between them,  
473 and were placed very close to the electrode contacts of the intramuscular electrodes. A schematic representation of  
474 this generator and the approximate location of the wire electrodes is shown in Fig. 7 (b). The generator was set to  
475 apply sinusoidal waveforms with amplitudes and frequencies similar to those expected for EMG (maximum  
476 amplitude: 1 mV; frequency range: 20 – 420 Hz in 16 steps defined by the generator).

### 477 3. *In vivo* validation

#### 478 3.1. Animal handling

479 The animal procedure was approved by the Ethical Committee for Animal Research of the Centre for  
480 Comparative Medicine and Bioimage (CMCiB) of the Germans Trias i Pujol Research Institute (IGTP), and by  
481 the Catalan Government (project number: 10109). Three New Zealand White male rabbits with a mass from 4 kg  
482 to 4.4 kg were employed for the proof-of-concept, one per session. The first session was meant for training and  
483 preliminary testing the devices; no results from it are reported here. The third session was meant for evaluating the  
484 implantation and explantation procedures of the intramuscular electrodes; no results are reported here.

485 For sedation and initial anesthesia, dexmedetomidine (0.15 mL/kg), butorfanol (0.04 mL/kg) and ketamine  
486 (0.08 mL/kg) were intramuscularly administered between 15 to 30 minutes prior to the preparation of the animal.  
487 Then, the left hindlimb of the rabbit was shaved, from the head of the femur to the mid tarsus. In addition, a  
488 depilatory cream (Veet sensitive skin, by Reckitt Benckiser Group plc) was applied for 3 minutes, the limb was  
489 thoroughly rinsed, and cleaned with alcohol and Betadine using a sterile gauze. The animal was transferred to an  
490 anesthetic circuit using endotracheal intubation and anesthesia was maintained with isoflurane (2-3% and 0.5% of  
491 O<sub>2</sub>). Ringer's lactate (8 mL/h) was administered intravenously, and the animal was constantly monitored with a  
492 capnograph, pulse oximeter, esophageal temperature sensor and non-invasive blood pressure sensor. A heating

493 pad and fluid warmer were employed during the entire session. At the end of the study, the animal was euthanized  
494 with an overdose of pentobarbital sodium (10 mL).

### 495 **3.2. Implantation procedure and extraction**

496 One semi-implantable device was used in the tibialis anterior (TA) muscle (Fig. 5 (b)) and a second semi-  
497 implantable device was used in the gastrocnemius medialis (GA) muscle, of the left hindlimb of the rabbits.  
498 Target muscles were identified by palpation and the approximate site for deploying the intramuscular electrode  
499 (i.e., close to the motor point) was located using anatomical cues. To verify the correct location of this target, a  
500 hook wire intramuscular electrode (003-400160-24 by SGM d.o.o.) was inserted into the muscle, and an Ag/AgCl  
501 gel electrode (model 2228 by 3M) placed on the thigh of the animal was used as a return electrode. Both  
502 electrodes were connected to a commercial current generator (Ultra 20, by Kege18), which delivered 1 to 2 mA  
503 biphasic pulses (pulse width: 200  $\mu$ s) at 100 Hz. If the induced movement was considered weak or did not match  
504 the expected joint movement, a new position was defined, and a hook wire electrode was inserted to verify the  
505 response. After the approximate location of the target point was successfully obtained, it was identified with a  
506 marker, and the hook wire was extracted.

507 The needle with the thin-film intramuscular electrodes was longitudinally introduced from the hock to the  
508 identified location close to the motor point, resulting in an insertion length of about 5 cm. The housing of the  
509 circuit was adhered to the skin of the rabbit to avoid the accidental extraction of the electrodes. Finally, the end of  
510 the guiding filament adhered to the Luer lock was cut, and the needle was gently extracted.

511 After the *in vivo* assays were finished, the intramuscular electrodes were extracted by holding the guiding  
512 filament and the electrodes' filament and gently pulling out.

### 513 **3.3. Stimulation assays**

514 After implantation, the animal was laid sideways and the left hindlimb was placed on a force test bench to  
515 measure isometric plantarflexion and dorsiflexion forces using a load cell (STC-10kgAL-S by Vishay Precision  
516 Group, Inc.). The output of the load cell was connected to a custom-made signal conditioning system composed of  
517 a precision instrumentation amplifier with a voltage gain of 100 V/V (LT1101 by Analog Devices, Inc.), a RC  
518 low-pass filter (cutoff frequency: 2 kHz), and an isolation amplifier with a fixed gain of 8.2 V/V (ACPL-790B by  
519 Broadcom, Corp.). This filter was used to avoid noise and HF interference that could be coupled to the test bench  
520 through the animal limb and the load cell. Its cutoff frequency was low enough to attenuate the HF current

521 (3 MHz), and the harmonics created by the downlink modulating signal. The resulting signal of the isolation  
522 amplifier was recorded using a 10-bit ADC, at a sampling rate of 4 kHz, and was digitally filtered using a 4th-  
523 order zero-phase forward and reverse Butterworth low-pass filter, with a cut-off frequency of 10 Hz. The load cell  
524 was fixed to a custom-made acrylic board, the hock was fixed to the board using an atraumatic padded clamp, and  
525 the foot was tied with cable ties to the load cell (Fig. 8 (a)). The external electrodes consisted in 1.5 cm wide  
526 bands made from silver-based stretchable conductive fabric (Shieldex® Technik-tex P130 + B (1150902130TB)  
527 by Statex Produktions und Vertriebs GmbH) strapped around the hindlimb of the animal (Fig. 5 (d)). The shortest  
528 distance between centers of external electrodes, corresponding to the posterior side of the hindlimb, was 6.5 cm.  
529 The electrodes were connected to the external system using high strength alligator clips (AK 2 S, by Hirschmann  
530 Test and Measurement). The HF current bursts applied were monitored using a differential active probe (TA043  
531 by Pico Technology) and a current probe (TCP2020 by Tektronix, Inc.) connected to a battery-powered  
532 oscilloscope (TPS2014 by Tektronix, Inc.).

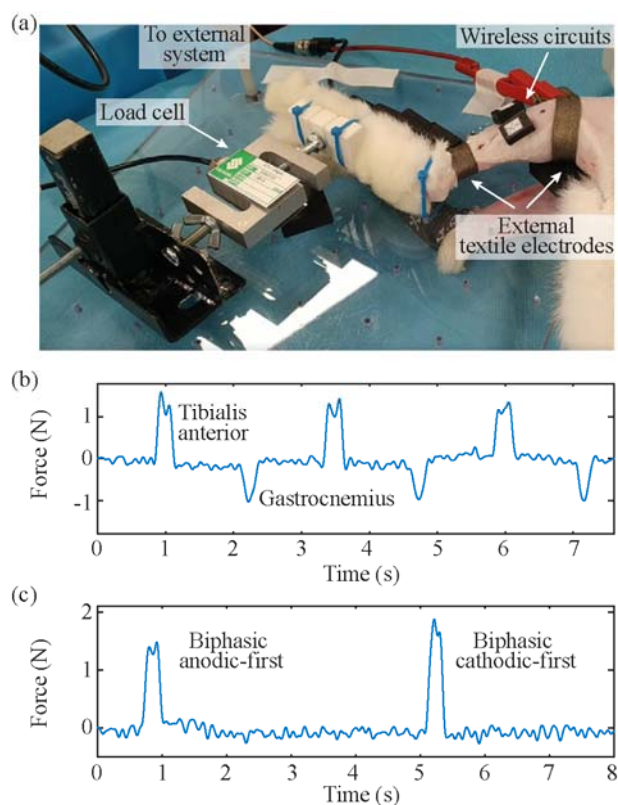

533

534 **Fig. 8. *In vivo* assays for electrical stimulation.** (a) Setup used for recording forces during electrical stimulation. Positive forces correspond to plantarflexion  
535 movements, while negative forces correspond to dorsiflexion movements. (b) Forces obtained by addressing, using the external system, the devices deployed  
536 in TA and GA muscles, both configured as biphasic, anodic-first stimulation. (c) Forces obtained after the external system changed the internal stimulation  
537 configuration (anodic/cathodic pulse first stimulation) of a device deployed in TA muscle. Both stimulation sequences were done with 20 stimulation pulses  
538 at 100 Hz with a pulse width of 100  $\mu$ s.

### 539 **3.4. EMG sensing assays**

540 Muscle activity was triggered with the pedal withdrawal reflex: a deep nociceptive reflex [43], which contracts  
541 the flexor muscles and relaxes the extensors muscles. To do so, the level of anesthesia was decreased until a reflex  
542 was obtained by pinching with forceps the interdigital space of the hindlimb [44]. When the pinch was done, an  
543 EMG acquisition was triggered by sending from the external system the start and stop sensing functions to the  
544 group of semi-implantable devices. Once the reflex was performed, the deep plane of anesthesia was recovered by  
545 increasing the isoflurane rate or, alternatively, in two instances, by intravenous injection of a low dose of propofol  
546 (0.25 mg/kg). During the assays, it was verified that the TA muscle contracted with the withdrawal reflex, as it is  
547 the case in humans [45], but as the level of anesthesia was low, immediately after the reflex the GA muscle could  
548 be also activated. To avoid loosening the external electrodes, therefore affecting the coupling for volume  
549 conduction, the foot of the rabbit during EMG sensing assays was not allowed to move by holding it with the  
550 force test bench used during electrical stimulation assays (Fig. 8 (a)).

## 551 **III. Results**

### 552 **1. *In vitro* assays**

553 For the *in vitro* assays, the external system was configured to deliver HF bursts with an amplitude of 39 V, a  
554 sinusoidal current frequency of 3 MHz, a burst duration ( $B$ ) of 1.6 ms, and a burst frequency ( $F$ ) of 50 Hz. This  
555 amplitude was the minimum required for the correct operation of the wireless device. The combination of duration  
556 and repetition frequency of the power maintenance bursts was enough to keep the wireless devices powered after  
557 the Power up stage (i.e., idle mode).

#### 558 **1.1 Powering the wireless device**

559 The impedance magnitude of the intramuscular electrodes, as measured across two electrode pairs in 0.9 %  
560 NaCl (Fig. 4 (d)), is flat beyond 10 kHz, and lower than 190  $\Omega$  at 1 MHz. This indicates that, at high frequencies,  
561 the impedance of the electrode-electrolyte interface is negligible in comparison with the combined resistance of  
562 the saline solution and of the tracks. Thus, at high frequencies, the contact impedance between the tissue and the  
563 circuit terminals will mostly correspond to the resistance of the tracks. The resistance measured between the distal  
564 electrode contacts (Electrode 'A') and the PCB pad was 56  $\Omega$ ; while that measured between the proximal  
565 electrode contacts (Electrode 'B') and the PCB pad was 28  $\Omega$ .



566 As expected by design, the wireless electronic circuit was successfully powered through the intramuscular  
567 electrodes using the HF current bursts delivered by the external system.

568 The time required by the control unit to initialize was much shorter than that required in [27], decreasing the  
569 duration of the initial Power up burst from 85 ms to 30 ms, therefore lowering the applied SAR. Fig. 7 (c) shows  
570 the modulating signal of the external system (i.e., when 3.3 V are measured at “Mod. signal”, the HF current is  
571 delivered), and how the regulator of the wireless circuit is able to provide a stable output (VCC) of 2.3 V  
572 approximately 26 ms after the modulating signal is activated. The stability of this VCC is required for the correct  
573 behavior of the circuit, specially the AFE.

574 The current consumptions during the idle mode, during the processing and basic operations mode and during  
575 the sensing mode were measured in the *in vitro* setup (Fig. 7 (a)) and the evaluation board connected to the  
576 intramuscular electrodes. The circuit required 180  $\mu$ A, 185  $\mu$ A, and 400  $\mu$ A respectively to power all its electronic  
577 components and the control unit’s peripherals required for the power mode defined.

## 578 **1.2 Electrical stimulation**

579 The external system was able to set the electrical stimulation configuration (biphasic/monophasic stimulation,  
580 anodic/cathodic pulse first) using the communication protocol designed for the bidirectional communications.  
581 This configuration can be changed at any time by sending a new configuration from the external system. The  
582 pulse duration, number of pulses and frequency of the pulses were successfully managed by the external system  
583 by defining the duration, number and frequency of the bursts of HF current.

584 Fig. 7 (d) shows an example of a biphasic, cathodic-first waveform, and a monophasic, cathodic-first  
585 waveform obtained in the *in vitro* setup. As indicated above, this signal is obtained after low-pass filtering the  
586 partially rectified current produced by the circuit, and digitally filtering it. The current limiters are activated using  
587 the digital outputs of the control unit, when the device decodes that a specific HF burst is meant for electrical  
588 stimulation (see the activation signal for the limiters in the lower graphs of Fig. 7 (d)). During these stimulation  
589 bursts, the amplitude of the HF current was increased to 47 V to deliver more energy to the semi-implantable  
590 devices, obtaining a maximum stimulation amplitude of 4.5 mA.

591 In the case of the biphasic waveforms, even if the circuit has mismatches between the current limiters that  
592 define the cathodic and anodic pulses, the dc-blocking capacitors and its discharge mechanism can balance the

593 charge applied in each pulse. In the case of monophasic waveforms, this same protection mechanism is used to  
594 perform purely passive charge-balanced stimulation [41].

### 595 **1.3 EMG acquisition**

596 The floating sinusoidal generator was set to apply different frequencies and amplitudes, which were then  
597 acquired by the wireless electronic circuit connected to the intramuscular electrodes. Even though the highest  
598 consumption of the control unit was during EMG sensing, the circuit was able to power and keep a steady voltage  
599 of 2.3 V during the sensing process (Fig. 7 (e), top, VCC). The output of the AFE measured from a test point of  
600 the evaluation board is shown in Fig. 7 (e). During the application of the HF bursts, the AFE saturated, but the  
601 circuit successfully recovered and returned to its baseline state to acquire EMG activity in-between bursts (Fig. 7  
602 (e), middle). The time window available to do a proper EMG acquisition was approximately 14 ms (see baseline  
603 time in Fig. 7 (e), middle). When the sinusoidal generator was turned on, the AFE was able to filter and amplify  
604 the signal picked up by the intramuscular electrodes. This signal was then digitized using the ADC of the control  
605 unit. Fig. 7 (e), bottom, shows an example of the output of the AFE when the sinusoidal generator was delivering  
606 a waveform of 280 Hz with an amplitude of 800  $\mu$ V.

### 607 **2. *In vivo* assays**

608 The intramuscular electrodes were easily inserted into the TA and GA muscles of the rabbits using the  
609 dedicated 23 G hypodermic needle. The insertion mechanism was robust and minimally invasive. Supplementary  
610 file 2 shows a video with the complete implantation procedure. Fig. 5 (d) shows an image of two wireless devices  
611 implanted in the hindlimb of the animal, and the location of the textile electrodes that connect to the low-level  
612 control unit of the external system. At the end of the assays, the electrodes were safely removed.

613 For these assays, the external system was configured to deliver HF bursts with an amplitude of 52 V, a  
614 frequency of 3 MHz, a burst duration ( $B$ ) of 1.6 ms, and a burst frequency ( $F$ ) of 50 Hz. The amplitude of the  
615 current during the bursts was 0.3 A. If the external system applies power maintenance bursts, the duty cycle ( $\beta$ ) is  
616 equal to 0.08 (i.e.,  $F \cdot B$ ). This low duty cycle scales down the applied HF bursts to 10.4  $V_{\text{rms}}$  and 0.06  $A_{\text{rms}}$ ,  
617 resulting in an average power of 0.62 W.

## 618 **2.1 Electrical stimulation**

619 The external system was able to configure the stimulation parameters of the wireless devices and control the  
620 devices to perform electrical stimulation. Fig. 8 (b) shows the forces obtained when the external system addressed  
621 the device deployed in the TA muscle, or the device deployed in the GA muscle. Both devices were configured to  
622 deliver biphasic, anodic-first pulses. The external system defined the stimulation protocol with pulse widths of  
623 100  $\mu$ s, and 20 pulses. The TA device was commanded to stimulate at 100 Hz, while the GA device was  
624 commanded at 150 Hz. These parameters obtained a maximum force of 1.6 N and 1 N respectively.

625 Fig. 8 (c) shows the effect of changing the internal configuration of the stimulation. The device deployed in the  
626 TA muscle was triggered to perform stimulation with fixed parameters: 20 pulses, 100  $\mu$ s, and 100 Hz. The device  
627 was configured at first for biphasic anodic-first stimulation. Few seconds after doing the stimulation, the device  
628 was reconfigured to do biphasic cathodic-first stimulation. The maximum force obtained for the first configuration  
629 was 1.5 N, while that of the second configuration was 2 N.

## 630 **2.2 EMG sensing**

631 The wireless devices reported here were capable of registering EMG signals and sending this information  
632 wirelessly to the external system. The circuit recorded raw signals according to the configuration set by the  
633 external system.

634 Fig. 9 shows an example of raw EMG signals obtained simultaneously by two wireless devices after the pedal  
635 withdrawal reflex was triggered, with the devices deployed in the TA and the GA muscles respectively (1 ksps).  
636 The EMG samples were uploaded to the external system using the communication protocol described above. The  
637 floating devices were able to acquire samples before, during and after the contraction. The period corresponding  
638 to the contraction can be observed as there is an episode in which the amplitude of the EMG increases  
639 significantly.

640

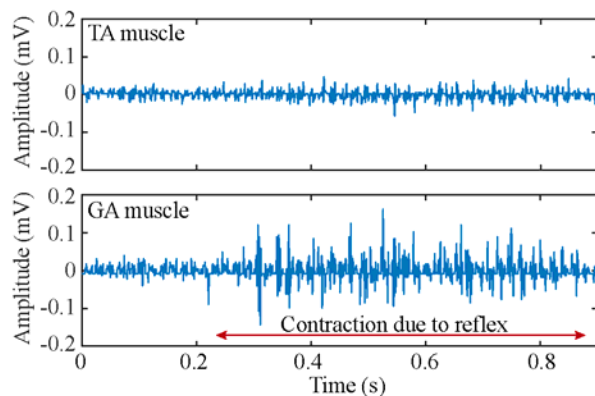

641

642 **Fig. 9. Example of raw EMG obtained after the reflex was triggered using a device implanted in the TA muscle and a second device implanted in**  
643 **the GA muscle.** This time window shows the moment after the TA muscle was activated by the reflex and the GA muscle is being activated. The amplitude  
644 of the muscular activity during contraction is clearly differentiated from that of the baseline.

645

### 646 2.3 Bidirectional communications

647 The control unit of the wireless circuit was able to reply to the requests sent from the external system, such as  
648 functional tasks (reset, stimulate, start/stop sensing, and send sample), configuration (set/send group belonging,  
649 set/send stimulation configuration, and set/send sensing configuration), and uplink special requirements (ping,  
650 retry send sample, and acknowledge). The communication protocol supports the possibility of sending these  
651 requests to one wireless circuit, or a group of them. This allows the use of the devices as a network of electrical  
652 stimulators and sensors, having the possibility to configure all these functionalities from the external system  
653 simultaneously.

654 The commands 'get sensing configuration' (downlink) followed by a 'send sensing configuration' reply  
655 (uplink) have the longer frames of the communication protocol stack. For this reason, they were used to test the  
656 quality of the bidirectional communications. Supplementary file 3 shows a screen recording video of a set of 100  
657 'get/send sensing configuration' requests to device 17 deployed in the TA muscle of the rabbit's hindlimb. The  
658 external system sent the request to the wireless devices, and after demodulation, decoding and error detection,  
659 device 17 interpreted that it should send the configuration information to the external system. The control unit  
660 coded this information and sent it back to the external system (i.e., performed uplink) using the load modulator.  
661 The screen shows the information received by the external system after demodulating, decoding, and performing  
662 error detection. A success rate of 100% was obtained.

### 663 3. Compliance with SAR limitation established by electrical safety standards

664 In the *in vitro* study, the external system was set to apply HF bursts with an amplitude of 39 V, which should  
665 produce an electric field in the middle of the region located between the two external textile electrodes with an  
666 amplitude of about 325 V/m [30].

667 The standards indicate that the SAR must be averaged for 6 minutes [33]. In this case, the possible sequences  
668 that can be made by the external system to interact with the wireless devices can have several combinations, all  
669 starting with a Power up, and having windows of time for power maintenance bursts. Supplementary Table 5,  
670 Supplementary file 1, reports three different sequences that could be used in three hypothetical scenarios: 1)  
671 Power up and maintenance, 2) Power up, 50 seconds of stimulation (biphasic, 200 Hz, 400  $\mu$ s pulse width)  
672 distributed in 6 minutes, and maintenance; and 3) Power up, 120 cycles composed of 1 s of sensing at 500 sps, 1 s  
673 delay for samples uplink and external processing, and 1 s of stimulation (biphasic, 100 Hz, 200  $\mu$ s pulse width),  
674 and maintenance. The second sequence corresponds to the worst-case scenario of stimulation, while the third  
675 sequence corresponds to a hypothetical scenario in which neuromuscular activity is used to control stimulation  
676 (e.g., for tremor management). To calculate the SAR at a point according to equation (1), the properties of muscle  
677 tissue at 3 MHz were used ( $\sigma$ : 0.57 S/m [42] and  $\rho$ : 1090 kg/m<sup>3</sup> [46]). The SAR obtained for the three sequences  
678 was 2.21, 3.40 and 8.10 W/kg respectively, below the 20 W/kg limit established by the standards. The sequences  
679 include enough power maintenance time to guarantee a steady power supply in the wireless devices during the  
680 second and third sequences (341.06 s and 266.73 s respectively).

### 681 IV. Discussion

682 In this article, we have reported the design and evaluation of floating devices capable of EMG sensing and  
683 electrical stimulation which are wirelessly powered and controlled by an external system using HF volume  
684 conduction across living tissues. The assayed devices and systems illustrate the feasibility of forming densely  
685 distributed networks of intramuscular wireless microsensors and microstimulators that communicate with external  
686 systems for analyzing neuromuscular activity and performing stimulation or controlling external devices.

687 The main aim of the present study was to test the capabilities of the circuit architecture of the floating devices  
688 to obtain power, to bidirectionally communicate with the external system, and to perform EMG sensing and  
689 stimulation. To facilitate this evaluation *in vivo*, and to enable future acute human trials, the devices were built as

690 semi-implantable devices: the circuit was designed to be kept outside of the body, and only the ultrathin  
691 intramuscular electrodes were to be injected. This semi-injectable conformation is not appropriate for chronic  
692 testing due to the possibility of infections, the risk of electrode tear up and accidental extraction. However, the  
693 circuit architecture demonstrated here is the basis for the development of an ASIC that includes all its capabilities,  
694 and that is intended to be integrated in a flexible threadlike implant with two electrodes at opposite ends. This  
695 would allow to have an implantable network of microstimulators and microsensors for BHNS that can be fully  
696 configured for specific clinical applications.

697 One of the main challenges of using the thin-film intramuscular electrodes presented here was the small  
698 surface area of the electrodes ( $3.8 \text{ mm}^2$ ) compared to cylindrical electrodes as those assayed in [27] (diameter:  
699  $2 \text{ mm}$ , length:  $3.8 \text{ mm}$ ; surface area:  $27 \text{ mm}^2$ ). Despite this limitation, it was possible to accomplish a sufficient  
700 surface area to obtain enough electric current to power the wireless miniature electronic circuit, and to perform  
701 safe electrical stimulation without exceeding the charge injection capacity of the electrodes.

702 Another substantial challenge was to combine the low-voltage EMG recordings with the high-voltage HF  
703 bursts for power. The WPT approach proposed here requires that the external system continuously delivers bursts  
704 of HF current for powering the wireless devices. The wireless device uses the same electrodes for powering,  
705 communications, EMG sensing and electrical stimulation. This implies that its AFE saturates when the HF bursts  
706 are applied by the external system. Despite this important limitation, and that the presence of the saturation of the  
707 AFE is seen in the raw recordings (flat lines in-between the EMG activity), the AFE designed for the circuit was  
708 able to have ample time windows ( $\sim 14 \text{ ms}$ ) to properly obtain EMG activity, ensuring a fast recovery from the  
709 saturation generated with the HF currents. These time windows will allow to record EMG signals with enough  
710 quality for their use in the BHNS proposed. Although the EMG recordings obtained were made with the hindlimb  
711 held to the load cell setup, it is intended that the system can be used in future acute human trials with free moving  
712 individuals, as the textile electrodes can be strapped firmly around the human limbs.

713 The WPT approach uses a single channel (the tissues) both for powering and communication. This implies that  
714 while information is sent from a wireless device to the external system (uplink), other wireless devices cannot  
715 send information, nor the external system can do downlink. Another critical aspect of the approach proposed is  
716 that the semi-implantable wireless devices use only two electrodes for powering, bidirectional communications,

717 EMG acquisition and electrical stimulation, limiting the possibility of performing several actions simultaneously.  
718 However, this characteristic favors the integration of the future ultrathin implantable devices (Fig. 1).

719 Supplementary Table 6, Supplementary file 1, compares different implantable EMG sensors reported in the  
720 literature. Remarkably, all the works identified make use of WPT by inductive coupling. There are two typical  
721 conformations: 1) a central unit connected to the electrodes using leads (e.g., the IST-12 [7], the MyoPlant [47],  
722 [15], [48] and Ripple [49]), and 2) a cluster of wireless cylindrical implants (IMES [50]). This last conformation is  
723 very convenient, as the implantation procedure can be done using minimally invasive techniques [51]. Similarly,  
724 we envision our wireless devices as cylindrical and flexible implants that can be deployed by injection. These  
725 implants would have a hermetic housing protecting the ASIC with the circuit architecture proposed here. The  
726 architecture has successfully demonstrated the possibility to acquire EMG activity, with amplification factor,  
727 bandwidth and resolution similar to that of other implantable devices (Supplementary Table 6, Supplementary file  
728 1). This can be useful for applications as neural interfaced assistive wearable robots for SCI, in which the control  
729 is done using intramuscular EMG-driven modelling [52]. The architecture has also demonstrated the possibility to  
730 perform electrical stimulation, opening the possibility to use the devices in multiple applications, including tremor  
731 management in essential tremor and Parkinson's disease, and prosthetics control with sensory feedback [53].

732 Another WPT method that is gaining importance due to the possibility of obtaining small form factors is  
733 ultrasonic acoustic coupling. Very recently it was demonstrated the possibility of sending information from  
734 implantable "motors" to an external system for the use of the implants as neural recorders [54]. Yet the  
735 demonstrated implants do not include a hermetic capsule required for long-term implantation [18]. The capsule  
736 would increase the size of the mote and could attenuate the ultrasounds, imposing a critical constraint regarding  
737 the amount of energy obtained by the implant electronics. Ultrasonic WPT has also demonstrated higher  
738 penetration depth compared to inductive and capacitive coupling [24]. However, this is done by means of beam  
739 focusing, making it more difficult to arrange the external transmitter for powering and communicating with  
740 networks of wireless devices arranged through the body. Another drawback of ultrasonic acoustic coupling is the  
741 need to use gel for coupling the external transceiver and the skin [55]. This may cause wounds because of  
742 humidity, irritation due to allergens [56], and may be uncomfortable for chronic applications. Our WPT approach  
743 based on volume conduction avoids these drawbacks. In [57] it was determined that it would be possible to use  
744 existing rechargeable portable batteries ( $> 100$  Wh/kg) for the external system, accomplishing a portable unit that

745 can be easily carried by patients. Also, the textile electrodes proposed do not require the use of gel and can be  
746 easily integrated in garments, making it more comfortable for the user, facilitating donning and doffing.

747 Implant depth is a critical parameter for WPT methods. Here the wireless device was tested *in vitro* by placing  
748 the intramuscular electrodes at a depth of 3.25 cm, and it could perform all the functions commanded from the  
749 external system. This ideal scenario did not include different conductivity layers as those that could be present due  
750 to other tissues. However, we have *in silico* demonstrated using a multilayered geometry, that the electric field  
751 generated by the HF current bursts delivered by the external system are coarsely uniform in the region located  
752 between the external electrodes [30]. More importantly, we recently demonstrated in arms and lower legs of  
753 healthy humans that electric powers above 2 mW and 5 mW respectively could be obtained using needle  
754 electrodes (diameter: 0.4 mm, length: 3 mm) implanted approximately 1.75 cm deep [31]. Therefore deeply  
755 implanted devices could be powered with this WPT approach.

## 756 **V. Conclusions**

757 The present work reports the development and successful evaluation of a technology composed of an external  
758 system that powers and controls wireless semi-implantable devices using a WPT approach based on volume  
759 conduction. Because the currents applied by the external system were applied in the form of bursts, they were  
760 below the heating limits defined by safety standards. The intramuscular electrodes proposed were appropriate for  
761 picking up the HF current bursts delivered by the external system to power and operate the designed miniature  
762 circuit. The semi-implantable devices for EMG sensing and stimulation could be configured and controlled from  
763 the external system using a bidirectional communications protocol that minimizes the application of HF currents.  
764 To the best of our knowledge, these are the first wireless devices powered by a WPT approach based on volume  
765 conduction that can do electrical stimulation and EMG sensing, and that bidirectionally communicate with the  
766 external system. It opens the path to the development of a BHNS that can do distributed electrical stimulation and  
767 sensing for neuroprostheses.

## 768 **References**

- 769 1. Kilgore KL, Anderson KD, Peckham PH. Neuroprosthesis for individuals with spinal cord injury. *Neurol*  
770 *Res* [Internet]. 2020 Jul 30;1–13. Available from: <https://doi.org/10.1080/01616412.2020.1798106>



- 771 2. Yildiz KA, Shin AY, Kaufman KR. Interfaces with the peripheral nervous system for the control of a  
772 neuroprosthetic limb: a review. *J Neuroeng Rehabil* [Internet]. 2020;17(1):43. Available from:  
773 <https://doi.org/10.1186/s12984-020-00667-5>
- 774 3. Basu I, Graupe D, Tuninetti D, Shukla P, Slavin K V, Metman LV, et al. Pathological tremor prediction  
775 using surface electromyogram and acceleration: potential use in ‘ON–OFF’ demand driven deep brain  
776 stimulator design. *J Neural Eng*. 2013;10(3):36019.
- 777 4. Pascual-Valdunciel A, Gonzalez-Sanchez M, Muceli S, Adan-Barrientos B, Escobar-Segura V, Perez-  
778 Sanchez JR, et al. Intramuscular stimulation of muscle afferents attains prolonged tremor reduction in  
779 essential tremor patients. *IEEE Trans Biomed Eng*. 2020;1.
- 780 5. Hunt AJ, Odle BM, Lombardo LM, Audu ML, Triolo RJ. Reactive stepping with functional  
781 neuromuscular stimulation in response to forward-directed perturbations. *J Neuroeng Rehabil* [Internet].  
782 2017;14(1):54. Available from: <https://doi.org/10.1186/s12984-017-0266-6>
- 783 6. Sensinger JW, Dosen S. A Review of Sensory Feedback in Upper-Limb Prostheses From the Perspective  
784 of Human Motor Control [Internet]. Vol. 14, *Frontiers in Neuroscience*. 2020. p. 345. Available from:  
785 <https://www.frontiersin.org/article/10.3389/fnins.2020.00345>
- 786 7. Hart RL, Bhadra N, Montague FW, Kilgore KL, Peckham PH. Design and Testing of an Advanced  
787 Implantable Neuroprosthesis With Myoelectric Control. *IEEE Trans Neural Syst Rehabil Eng* [Internet].  
788 2011 Feb [cited 2018 Apr 18];19(1):45–53. Available from: <http://ieeexplore.ieee.org/document/5585827/>
- 789 8. Bergmeister KD, Hader M, Lewis S, Russold M-F, Schiestl M, Manzano-Szalai K, et al. Prosthesis  
790 Control with an Implantable Multichannel Wireless Electromyography System for High-Level Amputees.  
791 *Plast Reconstr Surg*. 2016 Jan;137(1):153–62.
- 792 9. Memberg WD, Polasek KH, Hart RL, Bryden AM, Kilgore KL, Nemunaitis GA, et al. Implanted  
793 Neuroprosthesis for Restoring Arm and Hand Function in People With High Level Tetraplegia. Vol. 95,  
794 *Archives of Physical Medicine and Rehabilitation*. 2014. p. 1201-1211.e1.
- 795 10. Kane MJ, Breen PP, Quondamatteo F, ÓLaighin G. BION microstimulators: A case study in the  
796 engineering of an electronic implantable medical device. *Med Eng Phys*. 2011;33(1):7–16.
- 797 11. Merrill DR, Lockhart J, Troyk PR, Weir RF, Hankin DL. Development of an Implantable Myoelectric  
798 Sensor for Advanced Prosthesis Control. *Artif Organs* [Internet]. 2011 Mar [cited 2017 Jun 7];35(3):249–

- 799 52. Available from: <http://doi.wiley.com/10.1111/j.1525-1594.2011.01219.x>
- 800 12. Schulman JH. The Feasible FES System: Battery Powered BION Stimulator. *Proc IEEE*.  
801 2008;96(7):1226–39.
- 802 13. Dinis H, Mendes PM. A comprehensive review of powering methods used in state-of-the-art miniaturized  
803 implantable electronic devices. *Biosens Bioelectron* [Internet]. 2021;172:112781. Available from:  
804 <https://www.sciencedirect.com/science/article/pii/S0956566320307685>
- 805 14. Farnsworth BD, Triolo RJ, Young DJ. Wireless implantable EMG sensing microsystem. In: 2008 IEEE  
806 Sensors [Internet]. IEEE; 2008 [cited 2017 Sep 8]. p. 1245–8. Available from:  
807 <http://ieeexplore.ieee.org/document/4716669/>
- 808 15. Ng KA, Rusly A, Gammad GGL, Le N, Liu S-C, Leong K-W, et al. A 3-Mbps, 802.11g-Based EMG  
809 Recording System With Fully Implantable 5-Electrode EMGxbrk Acquisition Device. *IEEE Trans Biomed*  
810 *Circuits Syst*. 2020;14(4):889–902.
- 811 16. Lee J, Leung V, Lee A-H, Huang J, Asbeck P, Mercier PP, et al. Neural recording and stimulation using  
812 wireless networks of microimplants. *Nat Electron*. 2021;4(8):604–14.
- 813 17. Loeb GE, Peck RA, Moore WH, Hood K. BION<sup>TM</sup> system for distributed neural prosthetic interfaces. *Med*  
814 *Eng Phys*. 2001;23(1):9–18.
- 815 18. Piech DK, Johnson BC, Shen K, Ghanbari MM, Li KY, Neely RM, et al. A wireless millimetre-scale  
816 implantable neural stimulator with ultrasonically powered bidirectional communication. *Nat Biomed Eng*  
817 [Internet]. 2020;4(2):207–22. Available from: <https://doi.org/10.1038/s41551-020-0518-9>
- 818 19. Chang TC, Weber MJ, Charthad J, Baltasvias S, Arbabian A. End-to-End Design of Efficient Ultrasonic  
819 Power Links for Scaling Towards Submillimeter Implantable Receivers. *IEEE Trans Biomed Circuits Syst*.  
820 2018;12(5):1100–11.
- 821 20. Sonmezoglu S, Fineman JR, Maltepe E, Maharbiz MM. Monitoring deep-tissue oxygenation with a  
822 millimeter-scale ultrasonic implant. *Nat Biotechnol* [Internet]. 2021;39(7):855–64. Available from:  
823 <https://doi.org/10.1038/s41587-021-00866-y>
- 824 21. Sedehi R, Budgett D, Jiang J, Ziyi X, Dai X, Hu AP, et al. A Wireless Power Method for Deeply  
825 Implanted Biomedical Devices via Capacitively Coupled Conductive Power Transfer. *IEEE Trans Power*  
826 *Electron*. 2021;36(2):1870–82.

- 827 22. Sodagar AM, Amiri P. Capacitive coupling for power and data telemetry to implantable biomedical  
828 microsystems. In: 2009 4th International IEEE/EMBS Conference on Neural Engineering. 2009. p. 411–4.
- 829 23. Hossain ANMS, Erfani R, Mohseni P, Lavasani HM. On the Non-idealities of a Capacitive Link for  
830 Wireless Power Transfer to Biomedical Implants. *IEEE Trans Biomed Circuits Syst.* 2021;15(2):314–25.
- 831 24. Barbruni GL, Ros PM, Demarchi D, Carrara S, Ghezzi D. Miniaturised Wireless Power Transfer Systems  
832 for Neurostimulation: A Review. *IEEE Trans Biomed Circuits Syst.* 2020;1.
- 833 25. Turner BL, Senevirathne S, Kilgour K, McArt D, Biggs M, Menegatti S, et al. Ultrasound-Powered  
834 Implants: A Critical Review of Piezoelectric Material Selection and Applications. *Adv Healthc Mater.*  
835 2021;10(17):2100986.
- 836 26. Agarwal K, Jegadeesan R, Guo Y-X, Thakor N V. Wireless Power Transfer Strategies for Implantable  
837 Bioelectronics. *IEEE Rev Biomed Eng* [Internet]. 2017;10:136–61. Available from:  
838 <http://ieeexplore.ieee.org/document/7879807/>
- 839 27. Becerra-Fajardo L, Schmidbauer M, Ivorra A. Demonstration of 2-mm-Thick Microcontrolled Injectable  
840 Stimulators Based on Rectification of High Frequency Current Bursts. *IEEE Trans Neural Syst Rehabil*  
841 *Eng* [Internet]. 2017;25(8):1343–52. Available from: <http://ieeexplore.ieee.org/document/7726054/>
- 842 28. Ivorra A, Becerra-Fajardo L, Castellví Q. In vivo demonstration of injectable microstimulators based on  
843 charge-balanced rectification of epidermically applied currents. *J Neural Eng* [Internet]. 2015;12(6):66010.  
844 Available from: <http://stacks.iop.org/1741-2552/12/i=6/a=066010>
- 845 29. Tudela-Pi M, Becerra-Fajardo L, García-Moreno A, Minguillon J, Ivorra A. Power Transfer by Volume  
846 Conduction: In Vitro Validated Analytical Models Predict DC Powers above 1 mW in Injectable Implants.  
847 *IEEE Access.* 2020;1.
- 848 30. Tudela-Pi M, Minguillon J, Becerra-Fajardo L, Ivorra A. Volume Conduction for Powering Deeply  
849 Implanted Networks of Wireless Injectable Medical Devices: A Numerical Parametric Analysis. *IEEE*  
850 *Access.* 2021;9:100594–605.
- 851 31. Minguillon J, Tudela-Pi M, Becerra-Fajardo L, Perera-Bel E, Del-Ama AJ, Gil-Agudo Á, et al. Powering  
852 electronic implants by high frequency volume conduction: in human validation. *bioRxiv* [Internet]. 2021  
853 Jan 1;2021.03.15.435404. Available from: <https://www.biorxiv.org/content/10.1101/2021.03.15.435404v4>
- 854 32. Becerra-Fajardo L, Ivorra A. First steps towards an implantable electromyography (EMG) sensor powered

- 855 and controlled by galvanic coupling. In: World Congress on Medical Physics and Biomedical Engineering  
856 2018 IFMBE Proceedings. Springer Verlag; 2019. p. 19–22.
- 857 33. IEEE Standard for Safety Levels with Respect to Human Exposure to Electric, Magnetic, and  
858 Electromagnetic Fields, 0 Hz to 300 GHz. IEEE; 2019.
- 859 34. International Commission on Non-Ionizing Radiation (ICNIRP). Guidelines for limiting exposure to  
860 Electromagnetic Fields (100 kHz to 300 GHz). *Health Phys.* 2020;118(5):483–524.
- 861 35. Muceli S, Poppendieck W, Hoffmann K-P, Dosen S, Benito-León J, Barroso FO, et al. A thin-film  
862 multichannel electrode for muscle recording and stimulation in neuroprosthetics applications. *J Neural*  
863 *Eng.* 2019 Apr 1;16(2):026035.
- 864 36. Rose TL, Robblee LS. Electrical stimulation with Pt electrodes. VIII. Electrochemically safe charge  
865 injection limits with 0.2 ms pulses (neuronal application). *IEEE Trans Biomed Eng.* 1990;37(11):1118–20.
- 866 37. Poppendieck W, Sossalla A, Krob M-O, Welsch C, Nguyen TAK, Gong W, et al. Development,  
867 manufacturing and application of double-sided flexible implantable microelectrodes. *Biomed*  
868 *Microdevices* [Internet]. 2014;16(6):837–50. Available from: <https://doi.org/10.1007/s10544-014-9887-8>
- 869 38. Muceli S, Poppendieck W, Negro F, Yoshida K, Hoffmann KP, Butler JE, et al. Accurate and  
870 representative decoding of the neural drive to muscles in humans with multi-channel intramuscular thin-  
871 film electrodes. *J Physiol* [Internet]. 2015 Sep 1;593(17):3789–804. Available from:  
872 <http://doi.wiley.com/10.1113/JP270902>
- 873 39. Poppendieck W, Dörge T, Hoffmann KP. Optimization of microporous platinum coatings for neural  
874 microelectrodes. In: 13th Annual International Conference of the IFES Society. 2008. p. 319–21.
- 875 40. Meyer J-U, Stieglitz T, Scholz O, Haberer W, Beutel H. High density interconnects and flexible hybrid  
876 assemblies for active biomedical implants. *IEEE Trans Adv Packag* [Internet]. 2001;24(3):366–74.  
877 Available from: <http://ieeexplore.ieee.org/document/938305/>
- 878 41. Cogan SF. Neural Stimulation and Recording Electrodes. *Annu Rev Biomed Eng.* 2008;10(1):275–309.
- 879 42. Gabriel C, Gabriel S. Compilation of the Dielectric Properties of Body Tissues at RF and Microwave  
880 Frequencies. [Internet]. 1996. Available from: <http://niremf.ifac.cnr.it/docs/DIELECTRIC/Report.html>
- 881 43. Silva A, Campos S, Monteiro J, Venâncio C, Costa B, Guedes de Pinho P, et al. Performance of Anesthetic  
882 Depth Indexes in Rabbits under Propofol Anesthesia: Prediction Probabilities and Concentration-effect

- 883 Relations. *Anesthesiology* [Internet]. 2011 Aug 1;115(2):303–14. Available from:  
884 <https://doi.org/10.1097/ALN.0b013e318222ac02>
- 885 44. Peeters ME, Gil D, Teske E, Eyzenbach V, Brom WE Vd, Lumeij JT, et al. Four methods for general  
886 anaesthesia in the rabbit: a comparative study. *Lab Anim*. 1988;22(4):355–60.
- 887 45. Spaich EG, Andersen OK, Arendt-Nielsen L. Tibialis Anterior and Soleus Withdrawal Reflexes Elicited  
888 by Electrical Stimulation of the Sole of the Foot during Gait. *Neuromodulation Technol Neural Interface*  
889 [Internet]. 2004 Apr 1;7(2):126–32. Available from: <https://doi.org/10.1111/j.1094-7159.2004.04016.x>
- 890 46. Hasgall P, Di Gennaro F, Baumgartner C, Neufeld E, Lloyd B, Gosselin M, et al. IT'IS Database for  
891 thermal and electromagnetic parameters of biological tissues [Internet]. Zurich; 2018. Available from:  
892 <https://itis.swiss/virtual-population/tissue-properties/>
- 893 47. Morel P, Ferrea E, Taghizadeh-Sarshouri B, Audí JMC, Ruff R, Hoffmann K-P, et al. Long-term decoding  
894 of movement force and direction with a wireless myoelectric implant. *J Neural Eng*. 2016 Feb  
895 1;13(1):016002.
- 896 48. Kampianakis E, Sharma A, Arenas J, Reynold MS. A Dual-Band Wireless Power Transfer and Backscatter  
897 Communication Approach for Real-Time Neural/EMG Data Acquisition. *IEEE J Radio Freq Identif*.  
898 2017;1(1):100–7.
- 899 49. McDonnall D, Hiatt S, Smith C, Guillory KS. Implantable multichannel wireless electromyography for  
900 prosthesis control. In: 2012 Annual International Conference of the IEEE Engineering in Medicine and  
901 Biology Society [Internet]. IEEE; 2012. p. 1350–3. Available from:  
902 <http://ieeexplore.ieee.org/document/6346188/>
- 903 50. Weir RF, Troyk PR, DeMichele GA, Kerns DA, Schorsch JF, Maas H. Implantable Myoelectric Sensors  
904 (IMESs) for Intramuscular Electromyogram Recording. *IEEE Trans Biomed Eng* [Internet]. 2009  
905 Jan;56(1):159–71. Available from: <http://ieeexplore.ieee.org/document/4633666/>
- 906 51. Pasquina PF, Evangelista M, Carvalho AJ, Lockhart J, Griffin S, Nanos G, et al. First-in-man  
907 demonstration of a fully implanted myoelectric sensors system to control an advanced electromechanical  
908 prosthetic hand. *J Neurosci Methods* [Internet]. 2015 [cited 2017 Jun 7];244:85–93. Available from:  
909 <http://www.sciencedirect.com/science/article/pii/S0165027014002672>
- 910 52. Jung MK, Muceli S, Rodrigues C, Megía-García Á, Pascual-Valdunciel A, del-Ama AJ, et al.

- 911 Intramuscular EMG-Driven Musculoskeletal Modelling: Towards Implanted Muscle Interfacing in Spinal  
912 Cord Injury Patients. *IEEE Trans Biomed Eng.* 2022;69(1):63–74.
- 913 53. Salminger S, Sturma A, Hofer C, Evangelista M, Perrin M, Bergmeister KD, et al. Long-term implant of  
914 intramuscular sensors and nerve transfers for wireless control of robotic arms in above-elbow amputees.  
915 *Sci Robot.* 2019;4(32):eaaw6306.
- 916 54. Ghanbari MM, Piech DK, Shen K, Alamouti SF, Yalcin C, Johnson BC, et al. A Sub-mm<sup>3</sup> Ultrasonic  
917 Free-Floating Implant for Multi-Mote Neural Recording. *IEEE J Solid-State Circuits.* 2019;54(11):3017–  
918 30.
- 919 55. Singer A, Robinson JT. Wireless Power Delivery Techniques for Miniature Implantable Bioelectronics.  
920 *Adv Healthc Mater.* 2021;2100664.
- 921 56. Chasset F, Soria A, Moguelet P, Mathian A, Auger Y, Francès C, et al. Contact dermatitis due to  
922 ultrasound gel: A case report and published work review. *J Dermatol.* 2016;43(3):318–20.
- 923 57. Becerra-Fajardo L, Garcia-Arnau R, Ivorra A. Injectable Stimulators Based on Rectification of High  
924 Frequency Current Bursts: Power Efficiency of 2 mm Thick Prototypes. In: Ibáñez J, González-Vargas J,  
925 Azorín JM, Akay M, Pons JL, editors. *Converging Clinical and Engineering Research on*  
926 *Neurorehabilitation II.* Cham: Springer International Publishing; 2017. p. 667–71.
- 927
- 928

## 929 **List of abbreviations**

930 BHNS: Bidirectional Hyper-Connected Neural Systems; AIMDs: active implantable medical devices; EMG:  
931 electromyography; SCI: spinal cord injury; WPT: wireless power transfer; HF: high frequency; ASICs:  
932 application-specific integrated circuits; UART: universal asynchronous receiver-transmitter; ASK: amplitude-shift  
933 keying; AFE: analog front-end; OSI: Open System Interconnection; SAR: specific absorption rate; ACK:  
934 acknowledge; PCB: printed circuit board; FEM: finite element method; SPICE: Simulation Program with  
935 Integrated Circuit Emphasis; GPIO: general-purpose input/output; ADC: analog-to-digital converter; LPF: low-  
936 pass filter; CMCiB: Centre for Comparative Medicine and Bioimage; IGTP: Germans Trias i Pujol Research  
937 Institute; TA: tibialis anterior; GA: gastrocnemius medialis.

938

## 939 **Declarations**

### 940 **Funding**

941 This work has received funding from the European Union's Horizon 2020 research and innovation programme  
942 under grant agreement No. 779982 (Project EXTEND - Bidirectional Hyper-Connected Neural System), and from  
943 the European Research Council (ERC) - European Union's Horizon 2020 research and innovation programme  
944 under grant agreement No. 724244 (eAXON). CR has been also partially funded by CSIC Interdisciplinary  
945 Thematic Platform (PTI+) NEURO-AGINGI+ (PTI-NEURO-AGING+). AI gratefully acknowledges the financial  
946 support by ICREA under the ICREA Academia programme.

### 947 **Authors' contributions**

948 LBF, JM, AS and AI conceived and designed the study. LBF, JM, CR and AI developed the electronic hardware  
949 and the software. MOK, CW, AS and AI designed and developed the intramuscular electrodes. LBF and JM  
950 conducted the experiments, performed data analysis and drafted the manuscript. MOK, CR, CW, MTP, AC, FOB,  
951 AS and AI revised the manuscript critically. All authors read and approved the final manuscript.

### 952 **Acknowledgements**

953 The authors would like to express their gratitude to the team at Centre for Comparative Medicine and Bioimage  
954 (CMCiB) of the Gemans Trias i Pujol Research Institute (IGTP) for their work regarding the animal procedures.

955

956 **Supplementary information**

957 Supplementary file 1. Appendix: supplementary document with additional information regarding methods and  
958 results. This supplementary information is indicated on the body of the research article.

959 Supplementary file 2. Video with implantation procedure.

960 Supplementary file 3. Video showing the screenshot of the external system during bidirectional communications  
961 in an anesthetized rabbit.
