# Supplementary material for: Floating EMG Sensors and Stimulators Wirelessly Powered and Operated by Volume Conduction for Networked Neuroprosthetics
Source: bioRxiv or medRxiv preprint supplement (doi:10.1101/2022.03.09.483628), 2022-05-19
Supplement: Supplementary file [file media-1.pdf]

1 **Appendix: Floating EMG Sensors and Stimulators Wirelessly Powered and Operated by Volume**  
2 **Conduction for Networked Neuroprosthetics**

3  
4 The following sections provide additional details on the methods and results regarding the development  
5 and evaluation of the presented system for EMG sensing and electrical stimulation.

6 **I. Supplementary Methods**

7 1. External system - communications protocol

8 Supplementary Table 1 reports the downlink commands included in the communication protocol stack, as well  
9 as the estimated time required for them.

10 Supplementary Table 1  
11 Downlink commands to one or multiple wireless devices

| Function          | Description                                                                              | Transmission time of the frame* | Active time**              | Observations                                                                                                                                                                  |
|-------------------|------------------------------------------------------------------------------------------|---------------------------------|----------------------------|-------------------------------------------------------------------------------------------------------------------------------------------------------------------------------|
| Ping              | Request ping to a specific wireless device.                                              | 200 $\mu$ s                     | 100 $\mu$ s of 200 $\mu$ s | Wireless device replies with an ACK.                                                                                                                                          |
| Reset             | Request reset to one or a group of wireless devices.                                     | 200 $\mu$ s                     | 100 $\mu$ s of 200 $\mu$ s | To one device or group. If only one wireless device is requested, it replies with ACK.                                                                                        |
| Set configuration | Configure stimulation.                                                                   | 280 $\mu$ s                     | 140 $\mu$ s of 280 $\mu$ s | To one device or group.                                                                                                                                                       |
|                   | Configure sensing.                                                                       | 280 $\mu$ s                     | 140 $\mu$ s of 280 $\mu$ s | To one device or group.                                                                                                                                                       |
|                   | Configure group and delivers burst for ACK uplink.                                       | 280 $\mu$ s                     | 140 $\mu$ s of 280 $\mu$ s | Wireless device replies with an ACK.                                                                                                                                          |
| Get configuration | Requests current configuration of stimulation, and delivers burst to uplink information. | 200 $\mu$ s                     | 100 $\mu$ s of 200 $\mu$ s | Wireless device replies with current stimulation configuration.                                                                                                               |
|                   | Requests current configuration of sensing, and delivers burst for uplink information.    | 200 $\mu$ s                     | 100 $\mu$ s of 200 $\mu$ s | Wireless device replies with current sensing configuration.                                                                                                                   |
|                   | Asks if pertains to a specific group, and delivers burst for ACK uplink.                 | 280 $\mu$ s                     | 140 $\mu$ s of 280 $\mu$ s | Wireless device replies with ACK if pertains to that group.                                                                                                                   |
| Stimulate         | Instruction and burst for activating stimulation in wireless device.                     | 200 $\mu$ s                     | 100 $\mu$ s of 200 $\mu$ s | To one device or group. External system defines pulse width and frequency of stimulation. Wireless device or group only starts stimulating if the configuration has been set. |
| Start sensing     | Requests start sensing.                                                                  | 200 $\mu$ s                     | 100 $\mu$ s of 200 $\mu$ s | To one device or group. Wireless device or group only starts sensing if the                                                                                                   |

|                 |                                                                                            |             |                            |                                                                                                                       |
|-----------------|--------------------------------------------------------------------------------------------|-------------|----------------------------|-----------------------------------------------------------------------------------------------------------------------|
|                 |                                                                                            |             |                            | configuration has been set.<br>If only one wireless device is requested, it replies with ACK.                         |
| Stop sensing    | Stop sensing.                                                                              | 200 $\mu$ s | 100 $\mu$ s of 200 $\mu$ s | To one device or group.<br>If only one wireless device is requested, it replies with ACK.                             |
| Fast get sample | Requests single acquisition and previous sample, and delivers burst to uplink information. | 120 $\mu$ s | 60 $\mu$ s of 120 $\mu$ s  | Does not include identifying code of wireless device as there will be only one device configured as raw in real time. |
| Get sample      | Requests sample and delivers burst for corresponding uplink information.                   | 200 $\mu$ s | 100 $\mu$ s of 200 $\mu$ s | Wireless device replies with a sample.                                                                                |
| Retry sample    | Requests last sample and delivers burst for corresponding uplink information.              | 200 $\mu$ s | 100 $\mu$ s of 200 $\mu$ s | In case the sample obtained with “get sample” instruction is not uplinked correctly.                                  |

\* To simplify calculations, these values have been rounded up assuming a byte transmission time of 40  $\mu$ s instead of the actual duration of 39.06  $\mu$ s (1 start bit + 1 byte + 1 stop bit). The transmission times reported include the synchronization byte time.

\*\* In downlink, active time is 50% of transmission time because of Manchester coding.

12

13 The stimulation and sensing configuration payloads of the communication protocol stack are reported in  
14 Supplementary Table 2. They can be sent to one wireless device or to a group of devices.

15

16

Supplementary Table 2  
Stimulation and sensing configuration payloads (downlink)

| Type of configuration             | Parameter                                              | Combinations                        |
|-----------------------------------|--------------------------------------------------------|-------------------------------------|
| Stimulation configuration payload | Type of waveform                                       | Monophasic<br>Biphasic              |
|                                   | First pulse                                            | Anodic-first<br>Cathodic-first      |
| Sensing configuration payload     | Sensing mode                                           | Raw<br>Parametric 1<br>Parametric 2 |
|                                   | Sampling frequency                                     | 250 sps                             |
|                                   |                                                        | 500 sps                             |
|                                   |                                                        | 750 sps                             |
| Sampling window                   | 1000 sps<br>Real time<br>Sampling windows (15 options) |                                     |

17

18 Supplementary Table 3 reports the uplink replies used by the wireless devices to send information to the external  
19 system. The replies correspond to requests sent by the external system with a previous downlink command. To do  
20 so, the external system waits for 2.3 ms after the downlink command so that the wireless devices can demodulate  
21 and decode the information and do further processing to answer the request. Then, the external system delivers a

22 HF current burst (1 ms) for power maintenance, followed by a 50  $\mu$ s pause in which no HF current is applied (serves  
 23 as synchronization flag), a transmission HF burst (timings reported in Supplementary Table 3), and 100  $\mu$ s power  
 24 maintenance burst. For example, if an ACK is requested by the external system, the external system delivers a 1 ms  
 25 burst, followed by a pause of 50  $\mu$ s, a transmission burst of 80  $\mu$ s (one synchronization byte and one information  
 26 byte), and a 100  $\mu$ s burst, for a total active time of 1.18 ms.

27  
 28

Supplementary Table 3  
 Uplink replies from one wireless device

| Function           | Description                                                 | Transmission time of the frame | Total active time  |
|--------------------|-------------------------------------------------------------|--------------------------------|--------------------|
| Send ACK           | Sends one acknowledgement to the external system.           | 80 $\mu$ s                     | 1.18 ms of 1.23 ms |
| Send sample        | Sends one sample to the external system.                    | 200 $\mu$ s                    | 1.3 ms of 1.35 ms  |
| Send configuration | Sends the stimulation configuration to the external system. | 160 $\mu$ s                    | 1.26 ms of 1.31 ms |
|                    | Sends the sensing configuration to the external system.     | 160 $\mu$ s                    | 1.26 ms of 1.31 ms |

The transmission times reported include the synchronization byte time.

29

## 30 2. Intramuscular electrodes - Design

31 This section details how the geometry of the electrode contacts of the intramuscular electrodes was determined.  
 32 In particular, it details how such geometry was designed to 1) ensure that enough power is obtained to supply the  
 33 floating circuit during the most power consuming mode (i.e., continuous EMG recording), and 2) generate  
 34 stimulation pulses with amplitudes above 2 mA and below 4 mA.

### 35 2.1. Model of tissues surrounding the intramuscular electrode, and electric field

36 The tissues surrounding the intramuscular electrode and the presence of the electric field applied by the external  
 37 system can be modeled with a Thévenin equivalent circuit [1]. To obtain the open circuit voltage ( $v_{OC}$ ) and the  
 38 equivalent impedance ( $Z_{Th}$ ) of that model, it was first performed a finite element method (FEM) study (in COMSOL  
 39 Multiphysics 4.4) that provided two geometrical scaling factors:  $K_{field}$ , which translates the electric field magnitude  
 40 (V/m) into the open circuit voltage across the active sites of the two electrodes; and  $K_{Rth}$ , which can be simply  
 41 understood as the scaling factor that transforms the tissue resistivity value ( $\Omega \cdot m$ ) into the equivalent resistance of  
 42 the Thévenin model. The amplitude ( $A$ ) of the Thévenin voltage source ( $v_{OC}$ ) was scaled as:

$$A = K_{field} |\vec{E}| \quad (S1)$$

43 where  $|\vec{E}|$  is the magnitude of the applied electric field. Here, for obtaining  $Z_{Th}$ , the impedance of tissues was not  
 44 merely modeled as a resistance but as the parallel combination of the equivalent resistance of the extracellular  
 45 medium ( $R_e$ ), and the series combination of the equivalent capacitance of the cell membranes ( $C_m$ ), and the  
 46 equivalent resistance of the intracellular medium ( $R_i$ ). That is, tissues were modeled by a lumped element model  
 47 with a single Debye relaxation.  $R_e$ ,  $R_i$  and  $C_m$  were scaled from  $K_{Rth}$  as follows:

$$R_{e_{xy}} = K_{Rth} \cdot \rho_e [\Omega] \quad (S2)$$

$$R_{i_{xy}} = K_{Rth} \cdot \rho_i [\Omega] \quad (S3)$$

$$C_{m_{xy}} = K_{field} \cdot c_m [F] \quad (S4)$$

48 where  $\rho_e$  and  $\rho_i$  are the equivalent resistivities of the extracellular and the intracellular media ( $\Omega \cdot m$ ), respectively,  
 49 and  $c_m$  is the volume capacitance (F/m). These three parameters ( $\rho_e$ ,  $\rho_i$  and  $c_m$ ) can be derived from experimental  
 50 data reported in [2][3]. In the case of muscle tissue their values are:  $\rho_e = 3.68 \Omega \cdot m$ ,  $\rho_i = 2.84 \Omega \cdot m$  and  $c_m =$   
 51  $0.11 \mu F/m$ . The open circuit voltage ( $v_{OC}$ ) and the equivalent impedance ( $Z_{Th}$ ) were incorporated in circuit  
 52 simulations as described later.

## 53 **2.2. FEM simulations**

54 The geometry of the FEM simulation consisted in a segment of polyimide filament containing two double-sided  
 55 active sites (i.e., actual electrodes). The segment had a width of  $420 \mu m$ , a thickness of  $100 \mu m$ , and a length of  
 56  $50 mm$  (Supplementary Figure 1a). The conductivity of the active sites was set to  $1 \times 10^6 S/m$  and the conductivity  
 57 of the polyimide substrate was set to  $1 \times 10^{-5} S/m$ . The segment was simulated within a  $0.1 m \times 0.1 m \times 0.1 m$  cube  
 58 with a conductivity of  $1 S/m$ . The segment was centered and aligned with one axis of the cube. Misalignments  
 59 between the segment and the applied electric field were also simulated ( $\alpha$ : angle between the electric field and the  
 60 electrodes' axis).

61

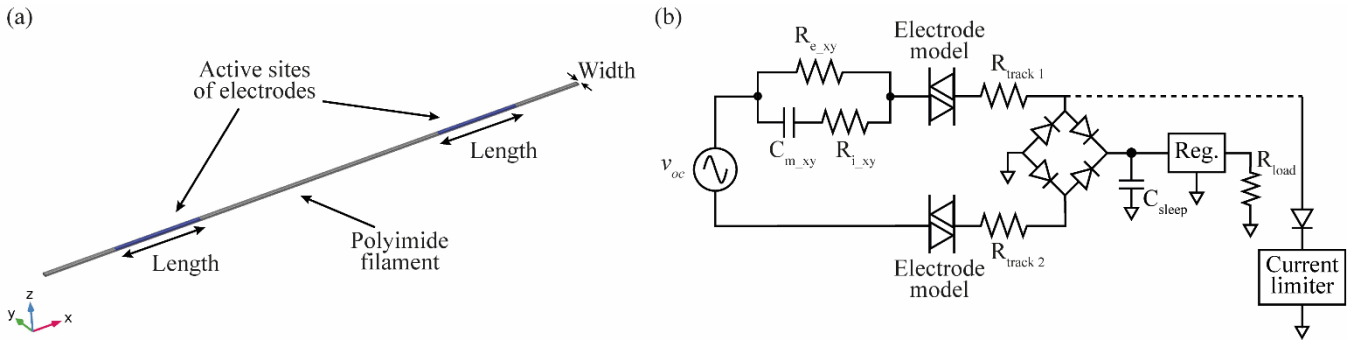

62

63  
64  
65  
66

Supplementary Figure 1. Electrode design. (a) Geometry of the intramuscular electrodes for FEM simulation. (b) SPICE circuit that includes the Thévenin equivalent circuit, the electrode model, and the resistance of the tracks that connect the active sites of the electrodes to the circuit's electronics. Two independent simulations were performed: a circuit to assay continuous power supply to a load  $R_{load}$ , and a circuit to assay the stimulation pulses with a single current limiter (power supply circuit disconnected).

67

68

69

70

The  $K_{field}$  value was obtained by measuring the voltage across the two active sites of the segment when it was simulated the delivery of a 1 V/m electric field. Such field was produced by applying a voltage of 0.1 V across the sides of the cube perpendicular to the segment. The  $K_{Rth}$  value was obtained by measuring the voltage across the two active sites of the segment when it was simulated the flow of a current of 1 A through both sites.

71

72

73

74

75

Supplementary Table 4 reports the geometrical scaling factors  $K_{field}$  and  $K_{Rth}$  obtained with the FEM simulation for different geometrical characteristics of the active sites of the electrodes. The distance between the active sites was limited by the maximum length of the polyimide filament, which was limited by the 68 mm diameter of the wafer on which the intramuscular electrodes were fabricated, and the need to ensure that the most proximal active site could be implanted deeply enough, beneath the subcutaneous fat layer.

76

77

78

The width and thickness of the polyimide filament were defined according to the characteristics of previous intramuscular electrodes fabricated using the same technology [4].

79  
80

Supplementary Table 4  
Results from FEM simulations

| Geometrical characteristics |        |          | Misalignment | Geometrical scaling factors obtained |                     |
|-----------------------------|--------|----------|--------------|--------------------------------------|---------------------|
| Width                       | Length | Distance | $\alpha$     | $K_{field}$                          | $K_{Rth}$           |
| 200 $\mu\text{m}$           | 4 mm   | 30 mm    | 0°           | 0.0300 m                             | 294 $\text{m}^{-1}$ |
| 200 $\mu\text{m}$           | 4 mm   | 30 mm    | 30°          | 0.0260 m                             | 294 $\text{m}^{-1}$ |
| 200 $\mu\text{m}$           | 7.5 mm | 30 mm    | 0°           | 0.0300 m                             | 181 $\text{m}^{-1}$ |
| 200 $\mu\text{m}$           | 7.5 mm | 30 mm    | 30°          | 0.0260 m                             | 181 $\text{m}^{-1}$ |
| 265 $\mu\text{m}$           | 4 mm   | 30 mm    | 0°           | 0.0300 m                             | 274 $\text{m}^{-1}$ |
| 265 $\mu\text{m}$           | 4 mm   | 30 mm    | 30°          | 0.0260 m                             | 273 $\text{m}^{-1}$ |
| 265 $\mu\text{m}$           | 7.5 mm | 30 mm    | 0°           | 0.0300 m                             | 171 $\text{m}^{-1}$ |
| 265 $\mu\text{m}$           | 7.5 mm | 30 mm    | 30°          | 0.0263 m                             | 171 $\text{m}^{-1}$ |
| 380 $\mu\text{m}$           | 2 mm   | 20 mm    | 0°           | 0.0200 m                             | 394 $\text{m}^{-1}$ |
| 380 $\mu\text{m}$           | 2 mm   | 20 mm    | 30°          | 0.0167 m                             | 394 $\text{m}^{-1}$ |
| 380 $\mu\text{m}$           | 4 mm   | 30 mm    | 0°           | 0.0303 m                             | 244 $\text{m}^{-1}$ |
| 380 $\mu\text{m}$           | 4 mm   | 30 mm    | 30°          | 0.0259 m                             | 247 $\text{m}^{-1}$ |
| 380 $\mu\text{m}$           | 5 mm   | 30 mm    | 0°           | 0.0292 m                             | 210 $\text{m}^{-1}$ |
| 380 $\mu\text{m}$           | 5 mm   | 30 mm    | 30°          | 0.0259 m                             | 210 $\text{m}^{-1}$ |
| 380 $\mu\text{m}$           | 5 mm   | 40 mm    | 0°           | 0.0395 m                             | 212 $\text{m}^{-1}$ |
| 380 $\mu\text{m}$           | 5 mm   | 40 mm    | 30°          | 0.0356 m                             | 212 $\text{m}^{-1}$ |

81

82 FEM simulations indicate that the value of the geometrical scaling factor  $K_{field}$ , which is proportional to the  
83 Thévenin voltage source of the Thévenin model (Supplementary Figure 1b), is approximately equal to

$$K_{field} = \cos(\alpha) \times L \quad (\text{S5})$$

84 where  $\alpha$  is the misalignment angle, and  $L$  is the length of the electrode contact. It is quite likely that the correct value  
85 is that obtained analytically, and that the small discrepancies between the expression and the simulation results  
86 (Supplementary Table 4) are due to numerical errors during the simulations.

### 87 2.3. SPICE simulations

88 The two geometrical scaling factors ( $K_{field}$  and  $K_{Rth}$ ) were used in SPICE simulations (LTspice XVII by Analog  
89 Devices, Inc.). The simulations include a resistance ( $R_{track}$ ) for modeling the resistance of the tracks that electrically  
90 connect the active sites to the pads where the floating circuit is connected; and the so-called electrode/electrolyte  
91 impedance with a model extracted from literature [5]. Two circuits were simulated: a circuit to assay continuous  
92 power supply, and a circuit to assay the stimulation pulses (Supplementary Figure 1b). For the former, a capacitor  
93 ( $C_{sleep}$ ) is used to smooth the input of a 2.5 V ideal regulator that supplies a resistive load ( $R_{load}$ ) with a current of  
94 300  $\mu\text{A}$ . For the latter, a realistic model for the electrical stimulation subcircuit implemented in the floating devices  
95 was simulated. The architecture of the subcircuit is explained below. The maximum values for stimulation  
96 amplitude, pulse duration and repetition frequency were set at 4 mA, 400  $\mu\text{s}$  and 100 Hz respectively, while the

97 power supply circuit was disconnected. In both simulations, the applied electric field was calculated by defining a  
 98 SAR of 2 W/kg, using bursts with a frequency ( $F$ ) of 50 Hz, and a duration ( $B$ ) of 1.6 ms.

99 The obtained geometrical scaling factors reported in Supplementary Table 4 were assayed in the two SPICE  
 100 simulations proposed. Here are reported the results for the final conformation, in which the active site has a width  
 101 of 265  $\mu\text{m}$  and a length of 7.5 mm, and the active sites have a separation distance of 30 mm. With this geometry,  
 102 the calculated resistance of the distal ( $R_{\text{track1}}$ ) and proximal ( $R_{\text{track2}}$ ) tracks is 49.1  $\Omega$  and 25.6  $\Omega$  respectively.

### 103 3. Electrical stimulation subcircuit of the miniature electronic circuit

104 Electrical stimulation is performed using two independent current limiters, each one connected to a Schottky  
 105 diode (RB521ZS-30 by ROHM Co., Ltd.) that is connected to the dc-blocking capacitor shown in Fig. 5 (e). When  
 106 the control unit of the floating device identifies the stimulation bursts, it activates a specific current limiter  
 107 depending on the polarity set during configuration. Supplementary Figure 2 shows an example in which biphasic  
 108 cathodic-first stimulation is done. When current limiter 1 (yellow) is activated by the control unit, it forces the flow  
 109 of stimulating (half-wave) rectified current through it, generating a negative low-frequency current seen from the  
 110 tissues. When the second current limiter is activated, it forces the flow of current to go in the opposite direction,  
 111 generating a positive low-frequency current seen from the tissues.

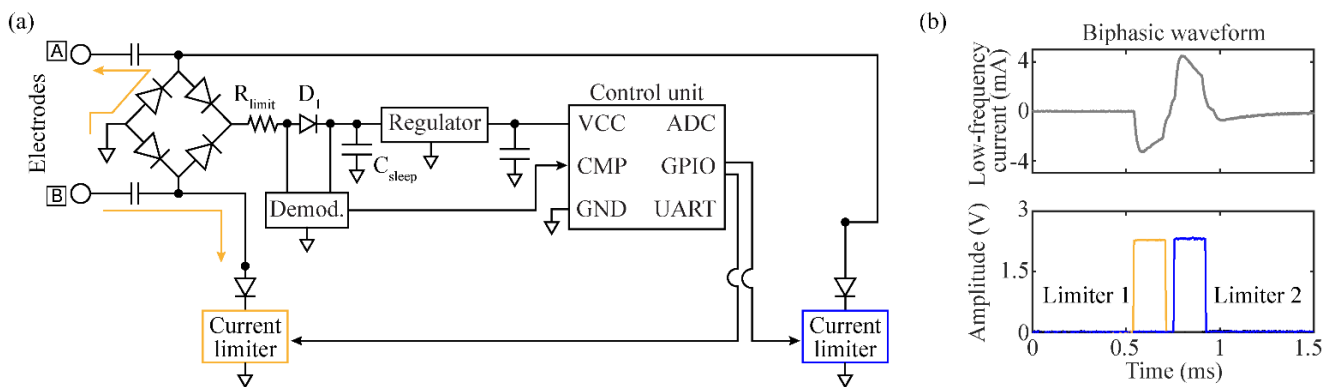

112  
 113 Supplementary Figure 2. Example of sequence for stimulation, and how the current limiter forces the flow of current in one direction or the other. (a) Basic  
 114 circuit architecture showing only the subcircuits required in the electrical stimulation mode. (b) Corresponding results of filtered low-frequency current applied,  
 115 and activation of current limiters.

116  
 117 The architecture of the current limiter is shown in Supplementary Figure 3. A BJT NPN transistor (BC847BFZ  
 118 by Diodes Incorporated) acts as an output transistor ( $Q_1$ ), and a second identical transistor ( $Q_2$ ) acts as a protection  
 119 transistor. When the voltage across the sensing resistor ( $R_{\text{sense}}$ ) is lower than the base-emitter voltage of  $Q_2$  ( $V_{\text{BE}}$ ),  
 120 only  $Q_1$  is active, and the current on the load ( $I_{\text{load}}$ ) will increase. As soon as the voltage across  $R_{\text{sense}}$  is higher than

121  $V_{BE}$ ,  $Q_2$  turns on and draws the base current of  $Q_1$ , reducing its collector current, therefore limiting  $I_{load}$ . Using this  
 122 topology, the current flowing through  $R_{sense}$  (i.e.,  $I_{load}$ ) depends on the value of this resistor. Each current limiter is  
 123 connected/disconnected from the load (i.e., the tissue) using a switch based on a N-channel MOSFET  
 124 (DMN2990UFZ by Diodes Incorporated) controlled by the control unit of the floating device using one GPIO.  
 125

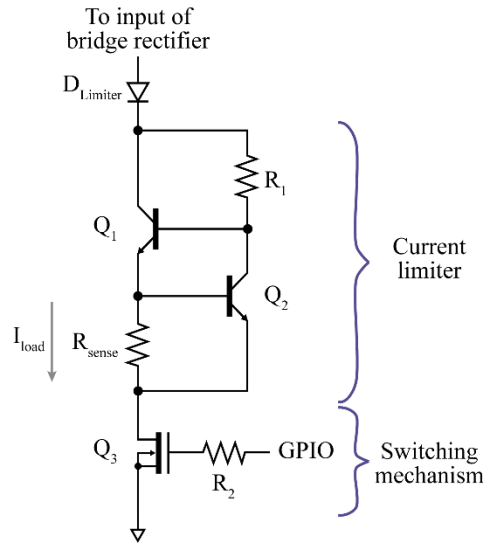

126  
 127 Supplementary Figure 3. Architecture of the current limiter's subcircuit.  
 128

## 129 II. Supplementary Results

### 130 1. SPICE simulations

131 To test the ability of the basic circuit (i.e., bridge rectifier,  $C_{sleep}$ , low-dropout linear regulator, a resistor as a  
 132 load, and a current limiter) to obtain a stable power supply using the geometrical scaling factors reported above, the  
 133 simulated voltage source of the external system was configured to deliver an initial Power up burst of 30 ms,  
 134 followed by short bursts for power maintenance ( $F$ : 50 Hz;  $B$ : 1.6 ms). Supplementary Figure 4 shows that the  
 135 circuit is able to obtain a steady output at the regulator after 350 ms from the start of the Power up. When the power  
 136 maintenance bursts are delivered by the external system (Supplementary Figure 4, top),  $C_{sleep}$  is charged and the  
 137 voltage across it increases accordingly (label "Regulator in").



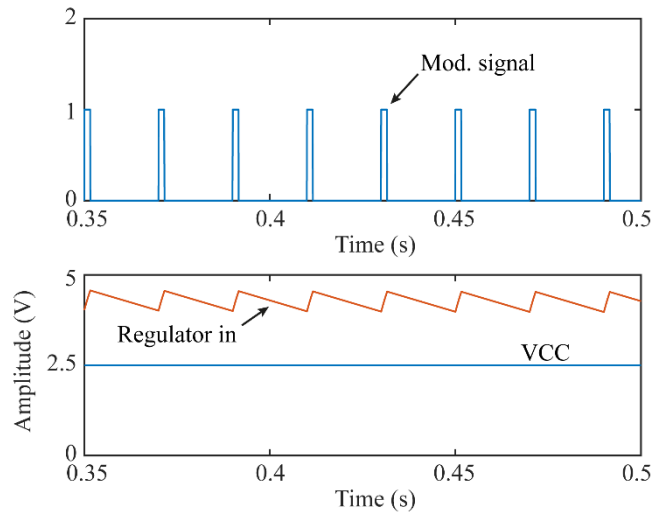

138

139 Supplementary Figure 4. SPICE simulation result of continuous power supply using the geometrical scaling factors obtained for a width of 265  $\mu\text{m}$ , a length  
 140 of 7.5 mm, and a separation distance of 30 mm (no misalignment). Top: Modulating signal corresponding to the times when the short bursts are delivered by  
 141 the voltage source. Bottom: Electric potential difference seen at the regulator's input and output (VCC).

142 Supplementary Figure 5 shows the low frequency current delivered by the simulated circuit when the current  
 143 limiter is activated. In this particular example, the current limiter is activated to deliver stimulation pulses with a  
 144 pulse width of 400  $\mu\text{s}$ , at a frequency of 100 Hz. This current is measured using a virtual LPF (cutoff frequency:  
 145 10 kHz) of the current flowing through the track resistor  $R_{\text{track}2}$ . According to simulations, the intramuscular  
 146 electrodes can deliver current with amplitudes above 4 mA to perform electrical stimulation.

147 The proposed width (0.260 mm) and length (7.5 mm) for each active site creates a total area of 3.9  $\text{mm}^2$  for each  
 148 electrode (two-sided electrode). Assuming stimulation pulses of maximum 400  $\mu\text{s}$ , and a very conservative  
 149 maximum charge injection capacity of 50  $\mu\text{C}/\text{cm}^2$ , the circuit should deliver a maximum current of 4.9 mA to avoid  
 150 irreversible reactions in the electrodes. This limit is above the maximum current required in the application proposed  
 151 here (4 mA).

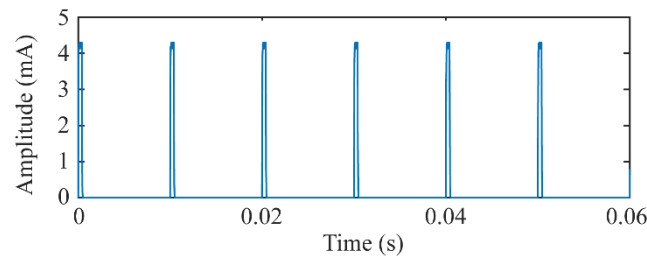

152

153 Supplementary Figure 5. SPICE simulation result of stimulation pulses delivered by the intramuscular electrodes using the geometrical scaling factors obtained  
 154 for a width of 265  $\mu\text{m}$ , a length of 7.5 mm, and a separation distance of 30 mm (no misalignment).

155

156 **2. Compliance with electrical safety standards**

157 The compliance with electrical safety standards study is based in the *in vitro* scenario. In this study the external  
158 system was set to apply HF current bursts with a frequency of 3 MHz and an amplitude of 39 V, equivalent to a  
159 peak electric field of 325 V/m. Supplementary Table 5 reports the calculated duty cycle (3),  $E_{rms}$  (2) and SAR  
160 calculated at a point (1) averaged over 6 minutes ( $\sigma$ : 0.57 S/m [6] and  $\rho$ : 1090 kg/m<sup>3</sup> [7] for muscle tissue at 3 MHz).  
161 using three different sequences. Sequence A indicates a sequence in which a Power up is applied, followed by power  
162 maintenance bursts. Sequence B proposes a sequence in which there is a Power up, followed by the instructions  
163 required to configure stimulation (biphasic, cathodic-first), and then 10,000 biphasic pulses (200 Hz, 400  $\mu$ s pulse  
164 width, 30  $\mu$ s interphase dwell) corresponding to 50 seconds of stimulation, and the reminder time used for power  
165 maintenance. Sequence C exemplifies a sequence in which a Power up is applied, followed by the configuration of  
166 EMG acquisition (raw, 500 sps), configuration of stimulation (biphasic, cathodic-first) followed by 120 cycles with  
167 a duration of 3 s, and that include: 1 s of EMG sensing (i.e., Start sensing is sent, followed by a Stop sensing 1 s  
168 after), 1 s of samples uplink and external processing (i.e., 500 Get samples followed by power maintenance bursts  
169 while the external system processes the results), and 1 s of stimulation (i.e., 100 biphasic pulses at 100 Hz, 200  $\mu$ s  
170 pulse width, 30  $\mu$ s interphase dwell).

171 **Supplementary Table 5**  
172 **Duty cycle,  $E_{rms}$  and SAR calculated for different bidirectional sequences with an averaging time of 6 minutes**

| <b>Sequence</b>                                                                               | <b>Duty cycle</b> | <b><math>E_{rms}</math> (V/m)</b> | <b>SAR (W/kg)</b> |
|-----------------------------------------------------------------------------------------------|-------------------|-----------------------------------|-------------------|
| A. Power and maintenance                                                                      | 0.08              | 65.03                             | 2.21              |
| B. Power, config. Stimulation, stimulate, and maintenance                                     | 0.12              | 80.63                             | 3.40              |
| C. Power, config., 120 cycles of sensing, samples uplink,<br>and stimulation; and maintenance | 0.29              | 124.44                            | 8.10              |

173  
174 **3. EMG sensors reported in the literature**

175 Supplementary Table 6 compares different implantable EMG sensors reported in the literature.  
176  
177  
178  
179  
180  
181

182  
183

Supplementary Table 6  
Comparison of implantable EMG sensors reported in literature

| Name                    | Powering method    | Electrode type              | Gain                 | Bandwidth           | ADC resolution | Form factor                                                              |
|-------------------------|--------------------|-----------------------------|----------------------|---------------------|----------------|--------------------------------------------------------------------------|
| Farnsworth et al. [8]   | Inductive coupling | Epimysial                   | 38 dB                | 1000 Hz             | 11 bits        | Central unit with leads; 6 mm Ø                                          |
| IMES [9] [10]           | Inductive coupling | Intramuscular               | 24.1 – 78 dB*        | 1000 Hz             | 8 bits         | Cylindrical; 2.5 mm Ø, 16 mm long                                        |
| IST-12 [11]             | Inductive coupling | Epimysial                   | 46 – 78 dB*          | 900 Hz              | 12 bits        | Central unit with leads; 40 × 38 × 7 mm (dimensions of electronics only) |
| MyoPlant [12][13]       | Inductive coupling | Epimysial                   | 33.6 –61 dB*         | 1500 Hz             | 10 bits        | Central unit with leads, 38 × 25 × 8 mm                                  |
| Ripple [14]             | Inductive coupling | Epimysial and intramuscular | 46 dB                | NA                  | 12 bits        | Central unit with leads; 70 × 35 mm                                      |
| IEAD [15,16]            | Inductive coupling | Intramuscular               | 55, 61.6 or 77.1 dB* | 5.0, 5.5 or 7.3 kHz | 10 bits        | Disc; 18 mm Ø, and central unit with leads; 10 × 20 mm                   |
| Reynolds et al. [17,18] | Inductive coupling | NA                          | 34 dB                | 700 Hz              | 11 bits        | Central unit with leads; 25 mm Ø, 2.8 mm thick                           |
| This work               | Volume conduction  | Intramuscular               | 54 dB                | 1000 Hz             | 10 bits        |                                                                          |

\* Programmable  
NA: information not available  
Ø: diameter

184

## 185 References

- 186 1. Tudela-Pi M, Becerra-Fajardo L, García-Moreno A, Minguillon J, Ivorra A. Power Transfer by Volume  
187 Conduction: In Vitro Validated Analytical Models Predict DC Powers above 1 mW in Injectable Implants.  
188 IEEE Access. 2020;1.
- 189 2. Andreuccetti D, Fossi R, Petrucci C. An Internet resource for the calculation of the dielectric properties of  
190 body tissues in the frequency range 10 Hz - 100 GHz. Website at <http://niremf.ifac.cnr.it/tissprop/>. IFAC-  
191 CNR, Florence (Italy), 1997. Based on data published by C.Gabriel et al. in 1996. 1997.
- 192 3. Gabriel S, Lau RW, Gabriel C. The dielectric properties of biological tissues: III. Parametric models for the  
193 dielectric spectrum of tissues. *Phys Med Biol*. 1996;41(11):2271–93.
- 194 4. Muceli S, Poppendieck W, Hoffmann K-P, Dosen S, Benito-León J, Barroso FO, et al. A thin-film  
195 multichannel electrode for muscle recording and stimulation in neuroprosthetics applications. *J Neural Eng*.  
196 2019 Apr 1;16(2):026035.
- 197 5. Jones MH, Scott J. Scaling of Electrode-Electrolyte Interface Model Parameters In Phosphate Buffered  
198 Saline. *IEEE Trans Biomed Circuits Syst*. 2015;9(3):441–8.

- 199 6. Gabriel C, Gabriel S. Compilation of the Dielectric Properties of Body Tissues at RF and Microwave  
200 Frequencies. [Internet]. 1996. Available from: <http://niremf.ifac.cnr.it/docs/DIELECTRIC/Report.html>
- 201 7. Hasgall P, Di Gennaro F, Baumgartner C, Neufeld E, Lloyd B, Gosselin M, et al. IT'IS Database for thermal  
202 and electromagnetic parameters of biological tissues [Internet]. Zurich; 2018. Available from:  
203 <https://itis.swiss/virtual-population/tissue-properties/>
- 204 8. Farnsworth BD, Triolo RJ, Young DJ. Wireless implantable EMG sensing microsystem. In: 2008 IEEE  
205 Sensors [Internet]. IEEE; 2008 [cited 2017 Sep 8]. p. 1245–8. Available from:  
206 <http://ieeexplore.ieee.org/document/4716669/>
- 207 9. Weir RF, Troyk PR, DeMichele GA, Kerns DA, Schorsch JF, Maas H. Implantable Myoelectric Sensors  
208 (IMESs) for Intramuscular Electromyogram Recording. IEEE Trans Biomed Eng [Internet]. 2009  
209 Jan;56(1):159–71. Available from: <http://ieeexplore.ieee.org/document/4633666/>
- 210 10. Salminger S, Sturma A, Hofer C, Evangelista M, Perrin M, Bergmeister KD, et al. Long-term implant of  
211 intramuscular sensors and nerve transfers for wireless control of robotic arms in above-elbow amputees. Sci  
212 Robot. 2019;4(32):eaaw6306.
- 213 11. Hart RL, Bhadra N, Montague FW, Kilgore KL, Peckham PH. Design and Testing of an Advanced  
214 Implantable Neuroprosthesis With Myoelectric Control. IEEE Trans Neural Syst Rehabil Eng [Internet].  
215 2011 Feb [cited 2018 Apr 18];19(1):45–53. Available from: <http://ieeexplore.ieee.org/document/5585827/>
- 216 12. Morel P, Ferrea E, Taghizadeh-Sarshouri B, Audí JMC, Ruff R, Hoffmann K-P, et al. Long-term decoding  
217 of movement force and direction with a wireless myoelectric implant. J Neural Eng. 2016 Feb  
218 1;13(1):016002.
- 219 13. Lewis S, Russold M, Dietl H, Ruff R, Audí JMC, Hoffmann K-P, et al. Fully Implantable Multi-Channel  
220 Measurement System for Acquisition of Muscle Activity. IEEE Trans Instrum Meas. 2013;62(7):1972–81.
- 221 14. McDonnall D, Hiatt S, Smith C, Guillory KS. Implantable multichannel wireless electromyography for  
222 prosthesis control. In: 2012 Annual International Conference of the IEEE Engineering in Medicine and  
223 Biology Society [Internet]. IEEE; 2012. p. 1350–3. Available from:  
224 <http://ieeexplore.ieee.org/document/6346188/>
- 225 15. Ng KA, Rusly A, Gammad GGL, Le N, Liu S-C, Leong K-W, et al. A 3-Mbps, 802.11g-Based EMG  
226 Recording System With Fully Implantable 5-Electrode EMGxbrk Acquisition Device. IEEE Trans Biomed

- 227 Circuits Syst. 2020;14(4):889–902.
- 228 16. Ng KA, Yuan C, Rusly A, Do A-T, Zhao B, Liu S-C, et al. A Wireless Multi-Channel Peripheral Nerve  
229 Signal Acquisition System-on-Chip. *IEEE J Solid-State Circuits*. 2019;54(8):2266–80.
- 230 17. Kampianakis E, Sharma A, Arenas J, Reynold MS. A Dual-Band Wireless Power Transfer and Backscatter  
231 Communication Approach for Real-Time Neural/EMG Data Acquisition. *IEEE J Radio Freq Identif*.  
232 2017;1(1):100–7.
- 233 18. Thomas SJ, Harrison RR, Leonardo A, Reynolds MS. A Battery-Free Multichannel Digital Neural/EMG  
234 Telemetry System for Flying Insects. *IEEE Trans Biomed Circuits Syst*. 2012;6(5):424–36.

235
